# Supplementary material
Source: PubMed Central journal article supplement (PMC5746462)
Supplement: NIHMS911170-supplement-Supplementrary_materials.pdf [file NIHMS911170-supplement-Supplementrary_materials.pdf]

**Inhibition of calcium dependent protein kinase 1 (CDPK1) by pyrazolopyrimidine analogs decreases establishment and reoccurrence of central nervous system disease by *Toxoplasma gondii*.**

**Supporting Information**

Florentine U. Rutaganira<sup>1</sup>, Jennifer Barks<sup>2a</sup>, Mary Savari Dhason<sup>2a</sup>, Qiuling Wang<sup>2a</sup>, Michael S. Lopez<sup>1b</sup>, Shaojun Long<sup>2</sup>, Joshua B. Radke<sup>2</sup>, Nathaniel G. Jones<sup>2</sup>, Amarendar R. Maddirala<sup>3</sup>, James W. Janetka<sup>3</sup>, Majida El Bakkouri<sup>4</sup>, Raymond Hui<sup>4,5</sup>, Kevan M. Shokat<sup>1</sup>, and L. David Sibley<sup>2\*</sup>.

<sup>1</sup> Howard Hughes Medical Institute and Department of Cellular and Molecular Pharmacology, University of California, San Francisco, San Francisco, California 94158, USA

<sup>2</sup> Department of Molecular Microbiology, Washington University School of Medicine, St. Louis, MO, 63130, USA

<sup>3</sup> Department of Biochemistry and Molecular Biophysics, Washington University School of Medicine, St. Louis, MO, 63130, USA

<sup>4</sup> Structural Genomics Consortium, University of Toronto, MaRS South Tower, 101 College St, Toronto, ON, M5G 1L7, Canada

<sup>5</sup> Toronto General Hospital Research Institute, 200 Elizabeth St., Toronto, ON M5G 2C4, Canada

<sup>a</sup> contributed equally, listed alphabetically,

<sup>b</sup> Achaogen Inc. 1 Tower Place, #300, South San Francisco, CA 94080

\*Corresponding author

## Table of Contents

|                                                                                                                         |     |
|-------------------------------------------------------------------------------------------------------------------------|-----|
| Synthesis and Characterization of Intermediate Compounds.....                                                           | S3  |
| Synthesis and Characterization of Final Compounds.....                                                                  | S9  |
| Figure S1. XenoSite Analysis of Compounds <b>1</b> , <b>2</b> , <b>3</b> , and <b>4</b> .....                           | S22 |
| Table S1. Crystallographic Details and Refinement Statistics.....                                                       | S23 |
| Figure S2. Crystallography Difference Maps.....                                                                         | S24 |
| Figure S3. Kinome Profiling Trees.....                                                                                  | S25 |
| Table S2. CK1 $\epsilon$ off-target inhibition by compounds 3MBPP1, <b>1</b> , <b>2</b> , <b>13</b> and <b>24</b> ..... | S26 |
| Table S3. ThermoFisher Scientific Z'-LYTE Kinase Profiling.....                                                         | S27 |
| Table S4. ThermoFisher Scientific Adapta Kinase Profiling.....                                                          | S32 |
| Table S5. ThermoFisher Scientific Z'-LYTE Kinase Profiling.....                                                         | S33 |
| Supporting Information References.....                                                                                  | S37 |

## Synthesis and Characterization of Intermediate Compounds

### Scaffold Synthesis

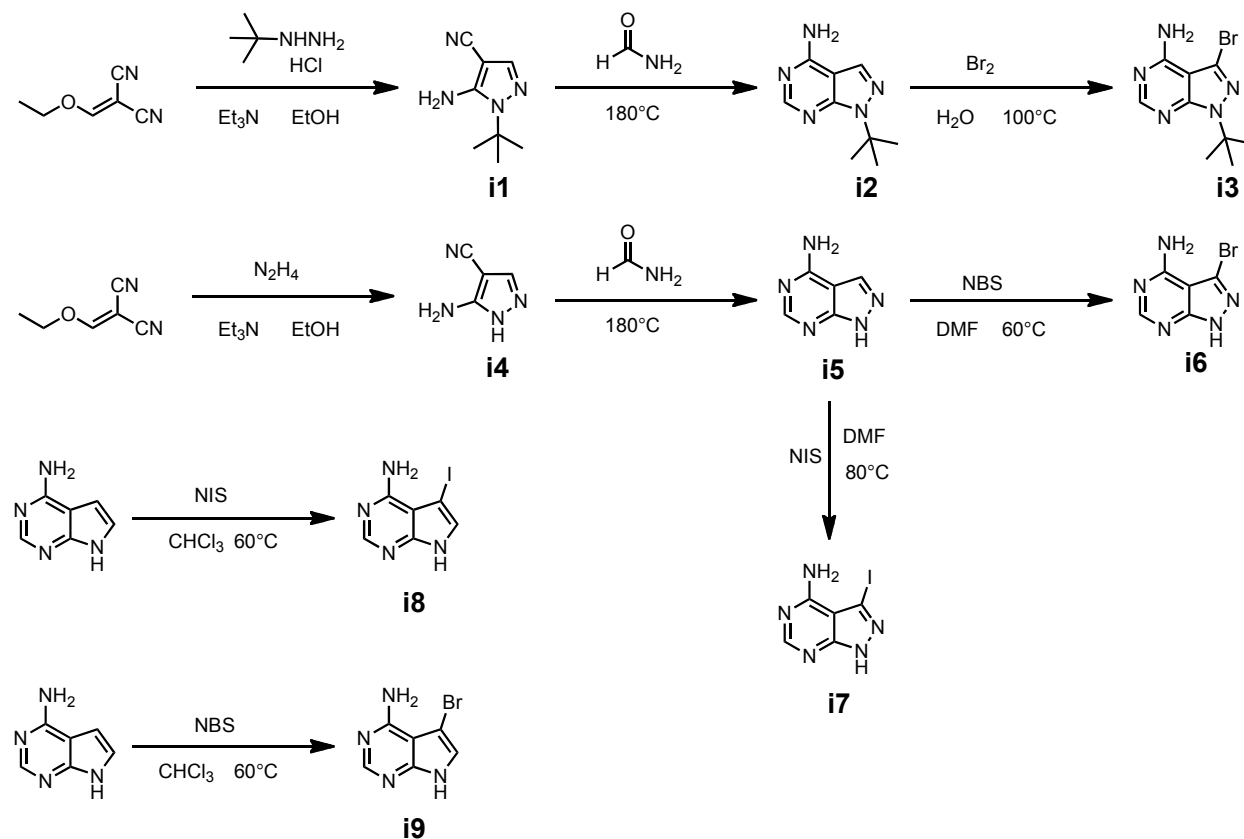

### *Generation of the pyrazolopyrimidine scaffold*

The synthesis of the pyrazolopyrimidine scaffold and methods for the diversification and utilization of this scaffold have been previously described<sup>1-3</sup>.

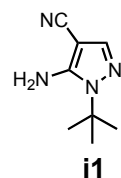

**i1: 5-amino-1-(*tert*-butyl)-1*H*-pyrazole-4-carbonitrile.** In a 250mL flame-dried argon purged round bottom flask, triethylamine (1.78g, 17.7mmol), and *t*-butyl hydrazine hydrochloride (1.56g, 12.5mmol) are dissolved in anhydrous ethanol (85mL). Ethoxymethylenemalononitrile (1.98g, 17.7mmol) is added slowly and reaction mixture is brought to reflux at  $82^\circ\text{C}$  for 3 hours. The solvent is removed *in vacuo* and 10% ethyl acetate / hexane is added (5mL) and the mixture is sonicated (or simply utilize recrystallization from 10% ethyl acetate / hexane). The resulting crystalline solid is

filtered, and washed with ether to yield **i1**. LC-MS (ES+) calcd for C<sub>8</sub>H<sub>12</sub>N<sub>4</sub> (M+H)<sup>+</sup> 165.11, found 165.05.

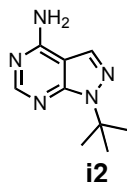

**i2: 1-(tert-butyl)-1H-pyrazolo[3,4-d]pyrimidin-4-amine.** Formamide (35mL) is added to intermediate **i1** (~2.75g) and the mixture is heated to 180°C for 3 hours. Upon cooling, the mixture is added to water and extracted with ethyl acetate using sodium bicarbonate to wash the organic followed by a careful water wash as to avoid emulsion and lastly a wash with saturated brine. The organic layer is dried *in vacuo* and is recrystallized from a small amount of ether to yield intermediate **i2**. LC-MS (ES+) calcd for C<sub>9</sub>H<sub>13</sub>N<sub>5</sub> (M+H)<sup>+</sup> 192.12, found 192.21.

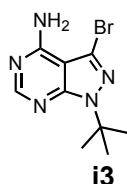

**i3: 3-bromo-1-(tert-butyl)-1H-pyrazolo[3,4-d]pyrimidin-4-amine.** Intermediate **i2** (~300mgs) is suspended in water (7mL) and bromine (188uL, 2 equivalents) is added and the reaction mixture is stirred at room temperature for 1 hour followed by stirring at 100°C for 1 hour. Upon cooling, the precipitated product is separated by filtration and the filtrate is stirred in 5% aqueous sodium hydrogen sulfite (12mL) for 30 minutes and the solution is treated with 5mL of saturated aqueous sodium bicarbonate. The precipitate is separated by filtration, washed with water and dried to yield brominated intermediate **i3**. LC-MS (ES+) calcd for C<sub>9</sub>H<sub>12</sub>BrN<sub>5</sub> (M+H)<sup>+</sup> 270.03, found 270.55, 272.40.

Synthesis of pyrazolopyrimidines without t-butyl modification at N1 proceeds similarly although hydrazine is utilized instead of a derivatized hydrazine reagent to yield intermediate **i4** followed by similar procedures in generating intermediates **i2** and **i3** to yield intermediates **i5** and **i6**<sup>4</sup>.

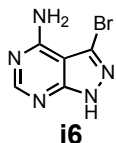

**i6: 3-bromo-1H-pyrazolo[3,4-d]pyrimidin-4-amine.** In a 250mL argon purged, flame-dried flask, 50mL DMF was added to dissolve 5g (37mmol) of starting material **i5**. NBS (6.5g, 36.5mmol) was added and the reaction heated to 60°C overnight. Upon cooling, and completion of reaction monitored by TLC, precipitate was filtered to yield intermediate **i6**. LC-MS (ES+) calcd for C<sub>5</sub>H<sub>4</sub>BrN<sub>5</sub> (M+H)<sup>+</sup> 213.97, found 213.76, 215.71.

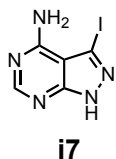

**i7: 3-iodo-1H-pyrazolo[3,4-d]pyrimidin-4-amine.** In a 100mL argon purged, flame-dried flask, 30mL DMF was added to dissolve 5g (37mmol) of starting material **i5**. NIS (12.3g, 54.7mmol) was added and the reaction was heated to 80°C overnight. Upon cooling, and completion of reaction monitored by TLC, precipitate was filtered to yield intermediate **i7**. Water was added to filtrate and resulting precipitant was also filtered to yield a second batch of intermediate **i7**. LC-MS (ES+) calcd for C<sub>5</sub>H<sub>4</sub>IN<sub>5</sub> (M+H)<sup>+</sup> 261.95, found 261.87.

### *Generation of the pyrrolopyrimidine scaffold*

The synthesis of the pyrrolopyrimidine scaffold proceeds by halogenation of advanced starting materials.

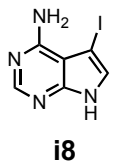

**i8: 5-iodo-7H-pyrrolo[2,3-d]pyrimidin-4-amine.** In a 20mL scintillation vial, purchased pyrrolopyrimidine (1g, 7.45mmol) was dissolved in 7mL of chloroform. NIS (2.18g, 9.69mmol) was added and reaction was refluxed for 2 hours. Upon cooling, precipitate was filtered to yield intermediate **i8**. LC-MS (ES+) calcd for C<sub>6</sub>H<sub>5</sub>IN<sub>4</sub> (M+H)<sup>+</sup> 260.96, found 260.61.

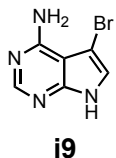

**i9: 5-bromo-7H-pyrrolo[2,3-d]pyrimidin-4-amine.** In a 20mL scintillation vial, purchased pyrrolopyrimidine (2g, 14.9mmol) was dissolved in 7mL of chloroform. NBS (3.5g, 19.38mmol) was added and reaction was refluxed for 2 hours. Upon cooling, the reaction is concentrated *in vacuo*. As dibromination was observed in addition to desired intermediate I9, silica gel chromatography (DCM/MeOH) was required to obtain desired intermediate **i9**. LC-MS (ES+) calcd for C<sub>6</sub>H<sub>5</sub>BrN<sub>4</sub> (M+H)<sup>+</sup> 212.97, found 212.68, 214.68. **i9** can also be purchased commercially.

### Strategy for Aryl Coupling

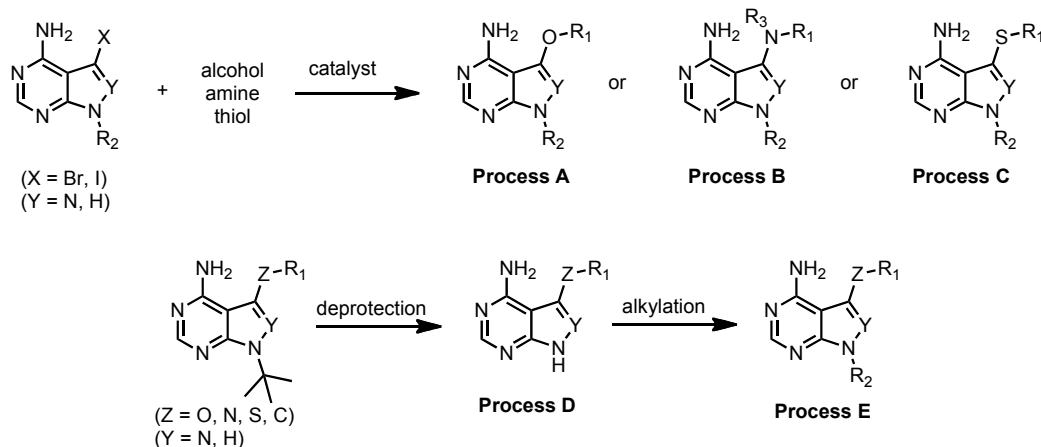

Addition of alcohol, amine or thiol to bromide or iodide pyrazolopyrimidine or pyrrolopyrimidine intermediate in the presence of catalyst generates ether (Process A), amine (Process B) and thioether (Process C) linked compounds respectively. Extensive summaries of copper<sup>5</sup> and palladium<sup>6</sup> catalyzed aryl couplings are available. Deprotection of t-butyl (Process D) followed by alkylation (Process E) generates advanced compounds with diversity at R<sub>2</sub>. Preparation can also proceed with R<sub>2</sub> already installed followed by catalyst assisted coupling. General procedures for each example follow.

### Process A

Synthesis proceeds by copper-catalyzed aryl coupling<sup>7</sup>. To an argon purged vial with magnetic stir bar is added intermediate **i3**, **i6**, or **i9** (1 eq.), alcohol (1.5 eq.), N,N-dimethylglycine (0.6 eq.), and cesium carbonate (2 eq.) in dry dioxane. After stirring for 5 minutes at room temperature, copper iodide is added (20mol%) and reaction is heated to 120°C and stirred overnight. Reaction completion is monitored by TLC and LC/MS.

After reaction is complete, water is added and compound is extracted into ethyl acetate and washed with water and brine. The organic layer is dried over sodium sulfate, filtered and concentrated *in vacuo*. Purification occurs via silica flash chromatography with a hexanes – ethyl acetate, dichloromethane – methanol, or ethyl acetate - ethanol gradient. Product fractions are collected and concentrated to a solid. For final products, an additional purification step with RP-HPLC eluting with water + 0.1% formic acid and acetonitrile + 0.1% formic acid is conducted to ensure >95% purity.

### Process B

Compounds with amine linkages were contracted out for synthesis. Methods to achieve amine linkage to C3 of the pyrazolopyrimidine scaffold by palladium-assisted Buchwald coupling have been described<sup>8-10</sup>. Example conditions are as follows: To an argon purged vial with magnetic stir bar is added intermediate **i2**, amine (1.2eq), potassium *tert*-butoxide (2.7eq), and BrettPhosPd G3 (3.6mol%) in 1mL dioxane and the reaction is heated to 90°C and stirred overnight. Reaction completion is monitored by TLC and LC/MS. After reaction is complete, reaction is purified by RP-HPLC eluting with water 0.1% formic acid and acetonitrile + 0.1% formic acid, pooling fractions with >95% purity.

### Process C

Different aryl couplings conditions are pursued dependent on X as bromide (intermediates **i3**, **i6**, or **i9**) or iodide (intermediates **i7**, **i8**).

For X as bromide, synthesis proceeds by palladium-catalyzed aryl coupling<sup>11</sup>. To an argon purged vial with magnetic stir bar is added intermediate **i3**, **i6**, or **i9** (1 eq.), N,N-diisopropylethylamine (2 eq.), Pd(dba)<sub>2</sub> (5mol%), XantPhos (5mol%) and thiol (1 eq.) in dioxane. Reaction is heated to 110°C overnight and then cooled to room temperature. Reaction completion is monitored by TLC and LC/MS. After reaction is complete, water is added and compound is extracted into ethyl acetate and washed with water and brine. The organic layer is dried over sodium sulfate, filtered and concentrated *in vacuo*. Purification occurs via silica flash chromatography with a hexanes – ethyl acetate, dichloromethane – methanol, or ethyl acetate - ethanol gradient. Product fractions are collected and concentrated to a solid. For final products, an additional purification step with RP-HPLC eluting with water + 0.1% formic acid and acetonitrile + 0.1% formic acid is conducted to ensure >95% purity.

For X as iodide, synthesis proceeds by copper-catalyzed aryl coupling<sup>12</sup>. To an argon purged vial with magnetic stir bar is added intermediate **i7**, or **i8** (1 eq.), thiol (1 eq.), copper iodide (5mol%), potassium carbonate (2.5 eq.), and ethylene glycol (5eq) in isopropanol. Reaction is heated to 130°C for 1 hour and then cooled to room temperature for 1 hour. Reaction completion is monitored by TLC and LC/MS. After reaction is complete, reaction is concentrated *in vacuo*, water is added and compound is extracted into ethyl acetate and washed with water and brine. The organic layer is

dried over sodium sulfate, filtered and concentrated *in vacuo*. Purification occurs via silica flash chromatography with a hexanes – ethyl acetate, dichloromethane – methanol, or ethyl acetate - ethanol gradient. Product fractions are collected and concentrated to a solid. For final products, an additional purification step with RP-HPLC eluting with water + 0.1% formic acid and acetonitrile + 0.1% formic acid is conducted to ensure >95% purity.

#### Process D

Synthesis proceeds by acid deprotection of t-butyl substituted pyrrolopyrimidine or pyrazolopyrimidine <sup>13</sup>. In a vial with magnetic stir bar is added t-butyl intermediate and a mixture of formic acid:hydrochloric acid (10:1), to dissolve the intermediate. The solution is refluxed for 2 hours, cooled and reaction completion is monitored by TLC and LC/MS. If reaction is not complete, the solution is brought again to reflux overnight or an additional part of hydrochloric acid is added and solution is refluxed for an additional 2 hours. Upon reaction completion, formic acid is removed *in vacuo*, water is added, and compound is extracted into ethyl acetate and washed with water and brine. The organic layer is dried over sodium sulfate, filtered and concentrated *in vacuo*. Purification occurs via silica flash chromatography with a hexanes – ethyl acetate, dichloromethane – methanol, or ethyl acetate - ethanol gradient. Product fractions are collected and concentrated to a solid.

#### Process E

Synthesis proceeds by alkylation of unsubstituted pyrrolopyrimidine or pyrazolopyrimidine intermediate from *Process D* <sup>14</sup>. To an argon purged vial with magnetic stir bar is added *Process D* intermediate (1 eq.), R<sub>2</sub>-mesylate (1.1 eq.) or R<sub>2</sub>-halide (1.1 eq.), and cesium carbonate (2-3 eq.), in dry DMF. Reaction is heated to 80°C overnight followed by cooling. Reaction completion is monitored by TLC and LC/MS. After reaction is complete, reaction is concentrated *in vacuo*, water is added and compound is extracted into ethyl acetate and washed with water and brine. The organic layer is dried over sodium sulfate, filtered and concentrated *in vacuo*. Purification occurs via silica flash chromatography with a hexanes – ethyl acetate, dichloromethane – methanol, or ethyl acetate - ethanol gradient. Product fractions are collected and concentrated to a solid. For final products, an additional purification step with RP-HPLC eluting with water + 0.1% formic acid and acetonitrile + 0.1% formic acid is conducted to ensure >95% purity.

If R<sub>2</sub> is protected (eg. Boc), deprotection follows and purification occurs via silica flash chromatography with a hexanes – ethyl acetate, dichloromethane – methanol, or ethyl acetate - ethanol gradient. Product fractions are collected and concentrated to a solid. For final products, an additional purification step with RP-HPLC eluting with water + 0.1% formic acid and acetonitrile + 0.1% formic acid is conducted to ensure >95% purity.

## Synthesis and Characterization of Final Products

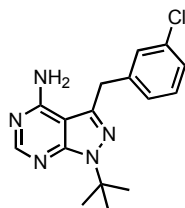

### 1: 1-(*tert*-butyl)-3-(3-chlorobenzyl)-1*H*-pyrazolo[3,4-*d*]pyrimidin-4-amine

Compound synthesis is already described<sup>15</sup>.

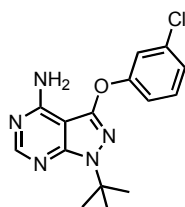

### 2: 1-(*tert*-butyl)-3-(3-chlorophenoxy)-1*H*-pyrazolo[3,4-*d*]pyrimidin-4-amine.

Compound is synthesized from **i3** using *Process A* with 3-chlorophenol as the alcohol. ESI-MS (ESI+) calcd for C<sub>15</sub>H<sub>16</sub>ClN<sub>5</sub>O (M+H)<sup>+</sup> 318.1043, found 318.1114. <sup>1</sup>H NMR (400 MHz, DMSO-*d*<sub>6</sub>) δ 8.17 (s, 1H), 7.55 (t, *J* = 2.1 Hz, 1H), 7.47 – 7.36 (m, 2H), 7.23 (ddd, *J* = 7.7, 2.0, 1.3 Hz, 1H), 1.66 (s, 9H). <sup>13</sup>C NMR (126 MHz, DMSO-*d*<sub>6</sub>) δ 157.8, 156.6, 156.6, 153.6, 149.5, 133.8, 131.4, 124.2, 119.1, 117.2, 91.1, 60.0, 29.2.

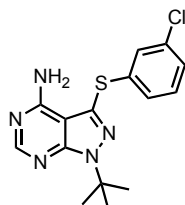

### 3: 1-(*tert*-butyl)-3-((3-chlorophenyl)thio)-1*H*-pyrazolo[3,4-*d*]pyrimidin-4-amine.

Compound is synthesized from **i3** using *Process C* with 3-chlorobenzethiol as the thiol. ESI-MS (ESI+) calcd for C<sub>15</sub>H<sub>16</sub>ClN<sub>5</sub>S (M+H)<sup>+</sup> 334.0815, found 334.0884. <sup>1</sup>H NMR (400 MHz, DMSO-*d*<sub>6</sub>) δ 8.23 (s, 1H), 7.38 – 7.26 (m, 3H), 7.09 (dt, *J* = 7.7, 1.4 Hz, 1H), 1.75 (s, 9H). <sup>13</sup>C NMR (100 MHz, DMSO-*d*<sub>6</sub>) δ 158.2, 156.0, 154.67, 138.1, 134.24, 131.6, 130.6, 127.1, 127.0, 126.3, 103.2, 61.3, 29.1.

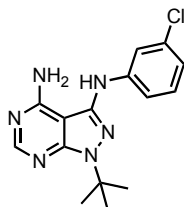

**4: 1-(*tert*-butyl)-*N*<sup>3</sup>-(3-chlorophenyl)-1*H*-pyrazolo[3,4-*d*]pyrimidine-3,4-diamine.**

Compound is synthesized using *Process B* with 3-chloroaniline as the amine. ESI-MS (ESI<sup>+</sup>) calcd for C<sub>15</sub>H<sub>17</sub>ClN<sub>6</sub> (M+H)<sup>+</sup> 317.1203, found 317.1273. <sup>1</sup>H NMR (CDCl<sub>3</sub>) δ 8.33 (1H), 7.20 – 7.17 (2H), 7.02 – 6.90 (2H), 6.78-6.76 (1H), 6.10 (1H), 5.28 (2H), 1.80 (9H).

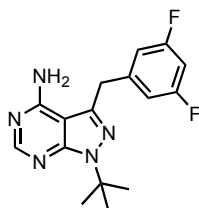

**5: 1-(*tert*-butyl)-3-(3,5-difluorobenzyl)-1*H*-pyrazolo[3,4-*d*]pyrimidin-4-amine.**

Compound synthesis is already described <sup>15</sup>.

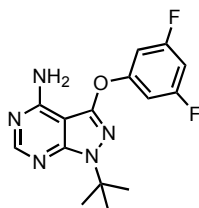

**6: 1-(*tert*-butyl)-3-(3,5-difluorophenoxy)-1*H*-pyrazolo[3,4-*d*]pyrimidin-4-amine.**

Compound is synthesized from **i3** using *Process A* with 3,5-difluorophenol as the alcohol. ESI-MS (ESI<sup>+</sup>) calcd for C<sub>15</sub>H<sub>15</sub>F<sub>2</sub>N<sub>5</sub>O (M+H)<sup>+</sup> 320.1245, found 320.1315. <sup>1</sup>H NMR (400 MHz, DMSO-*d*<sub>6</sub>) δ 8.18 (s, 1H), 7.29 – 7.22 (m, 2H), 7.07 (d, *J* = 2.3 Hz, 1H), 1.67 (s, 9H). <sup>13</sup>C NMR (126 MHz, DMSO-*d*<sub>6</sub>) δ 163.9, 161.9, 157.7, 157.4, 156.6, 153.5, 148.9, 102.9, 102.7, 91.0, 60.1, 29.2.

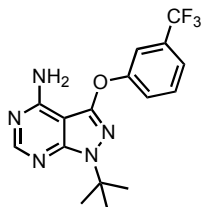

**7: 1-(*tert*-butyl)-3-(3-(trifluoromethyl)phenoxy)-1*H*-pyrazolo[3,4-*d*]pyrimidin-4-amine.** Compound is synthesized from **i3** using *Process A* with 3-(trifluoromethyl)phenol as the alcohol. ESI-MS (ESI+) calcd for  $C_{16}H_{16}F_3N_5O$  ( $M+H$ )<sup>+</sup> 352.1307, found 352.1374. <sup>1</sup>H NMR (400 MHz, DMSO-*d*<sub>6</sub>) δ 8.18 (s, 1H), 7.90 (t, *J* = 2.1 Hz, 1H), 7.77 (dd, *J* = 8.3, 2.4 Hz, 1H), 7.65 (t, *J* = 8.0 Hz, 1H), 7.57 – 7.51 (m, 1H), 1.66 (s, 9H). <sup>13</sup>C NMR (126 MHz, DMSO) δ 157.9, 156.6, 155.9, 153.6, 149.5, 131.3, 130.7, 130.4, 122.6, 120.8, 115.9, 90.9, 60.0, 29.2.

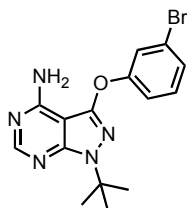

**8: 3-(3-bromophenoxy)-1-(*tert*-butyl)-1*H*-pyrazolo[3,4-*d*]pyrimidin-4-amine.** Compound is synthesized from **i3** using *Process A* with 3-bromophenol as the alcohol. ESI-MS (ESI+) calcd for  $C_{15}H_{16}BrN_5O$  ( $M+H$ )<sup>+</sup> 362.0538, found 362.0607, 364.0587. <sup>1</sup>H NMR (400 MHz, DMSO-*d*<sub>6</sub>) δ 8.17 (s, 1H), 7.72 – 7.67 (m, 1H), 7.48 – 7.33 (m, 3H), 1.66 (s, 9H). <sup>13</sup>C NMR (126 MHz, DMSO) δ 157.8, 156.6, 156.6, 153.6, 149.5, 131.7, 127.1, 122.0, 121.9, 117.6, 91.0, 60.0, 29.2.

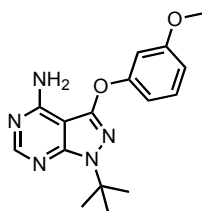

**9: 1-(*tert*-butyl)-3-(3-methoxyphenoxy)-1*H*-pyrazolo[3,4-*d*]pyrimidin-4-amine.** Compound is synthesized from **i3** using *Process A* with 3-methoxyphenol as the alcohol. ESI-MS (ESI+) calcd for  $C_{16}H_{19}N_5O_2$  ( $M+H$ )<sup>+</sup> 314.1539, found 314.1607. <sup>1</sup>H NMR (400 MHz, DMSO-*d*<sub>6</sub>) δ 8.17 (s, 1H), 7.29 (t, *J* = 8.2 Hz, 1H), 7.03 (t, *J* = 2.4 Hz, 1H), 6.93 (ddd, *J* = 8.2, 2.3, 0.8 Hz, 1H), 6.74 (ddd, *J* = 8.3, 2.5, 0.8 Hz, 1H), 3.76 (s, 3H), 1.66 (s, 9H). <sup>13</sup>C NMR (126 MHz, DMSO-*d*<sub>6</sub>) δ 160.7, 157.8, 157.1, 156.4, 153.6, 149.8, 130.5, 110.4, 110.0, 104.7, 59.9, 55.7, 29.3.

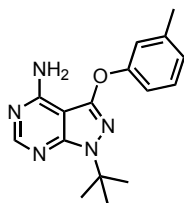

**10: 1-(tert-butyl)-3-(m-tolyloxy)-1H-pyrazolo[3,4-d]pyrimidin-4-amine.** Compound is synthesized from **i3** using *Process A* with 3-methylphenol (*m*-cresol) as the alcohol. ESI-MS (ESI+) calcd for  $C_{16}H_{19}N_5O$  (M+H)<sup>+</sup> 298.1590, found 298.1659. <sup>1</sup>H NMR (400 MHz, DMSO-*d*<sub>6</sub>) δ 8.17 (s, 1H), 7.28 (t, *J* = 7.9 Hz, 1H), 7.20 – 7.07 (m, 2H), 6.98 (d, *J* = 7.5 Hz, 1H), 2.32 (s, 3H), 1.65 (s, 9H). <sup>13</sup>C NMR (126 MHz, DMSO) δ 157.81, 156.40, 156.04, 153.58, 150.03, 139.71, 129.76, 124.95, 119.18, 115.49, 91.22, 59.89, 29.25, 21.47.

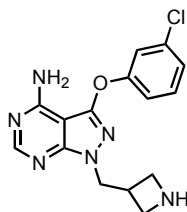

**11: 1-(azetidin-3-ylmethyl)-3-(3-chlorophenoxy)-1H-pyrazolo[3,4-d]pyrimidin-4-amine.** Compound is synthesized from **2** followed by *Process D* and then *Process E* with 1-boc-3-(bromomethyl)azetidine as the R<sub>2</sub>-halide. Alternatively, the compound can be synthesized by using intermediate **i6** followed by alkylation (*Process E*) with 1-boc-3-(bromomethyl)azetidine as the R<sub>2</sub>-halide and coupling by *Process A* with 3-chlorophenol as the alcohol. Boc deprotection follows to obtain the final product. ESI-MS (ESI+) calcd for  $C_{15}H_{15}ClN_6O$  (M+H)<sup>+</sup> 331.0996, found 331.1065. <sup>1</sup>H NMR (400 MHz, DMSO-*d*<sub>6</sub>) δ 8.14 (s, 1H), 7.49 (t, *J* = 2.1 Hz, 1H), 7.40 – 7.31 (m, 2H), 7.20 (dt, *J* = 7.7, 1.6 Hz, 1H), 4.33 (d, *J* = 6.6 Hz, 2H), 3.94 – 3.59 (m, 4H), 3.11 (s, 1H). <sup>13</sup>C NMR (126 MHz, DMSO) δ 156.7, 156.3, 156.0, 153.8, 152.5, 133.9, 131.5, 125.0, 119.9, 118.3, 89.7, 49.0, 47.7, 32.1.

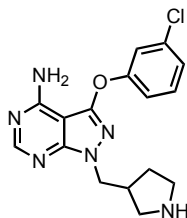

**12: 3-(3-chlorophenoxy)-1-(pyrrolidin-3-ylmethyl)-1H-pyrazolo[3,4-d]pyrimidin-4-amine.** Compound is synthesized from **2** followed by *Process D* and then *Process E* with tert-butyl 3-(bromomethyl)pyrrolidine-1-carboxylate as the R<sub>2</sub>-halide. Alternatively, the compound can be synthesized by using intermediate **i6** followed by alkylation (*Process E*) with tert-butyl 3-(bromomethyl)pyrrolidine-1-carboxylate as the R<sub>2</sub>-halide and coupling using *Process A* with 3-chlorophenol as the alcohol. Boc deprotection follows to obtain the final product. ESI-MS (ESI+) calcd for C<sub>16</sub>H<sub>17</sub>ClN<sub>6</sub>O (M+H)<sup>+</sup> 345.1152, found 345.1219. <sup>1</sup>H NMR (400 MHz, DMSO-*d*<sub>6</sub>) δ 8.21 (s, 1H), 7.55 (t, *J* = 2.2 Hz, 1H), 7.51 – 7.35 (m, 2H), 7.28 (dt, *J* = 7.8, 1.5 Hz, 1H), 4.27 (qd, *J* = 14.1, 7.0 Hz, 2H), 3.22 (td, *J* = 11.2, 10.7, 6.2 Hz, 2H), 3.08 (dt, *J* = 11.4, 7.9 Hz, 1H), 2.95 (dd, *J* = 11.6, 7.9 Hz, 1H), 2.84 – 2.58 (m, 1H), 2.03 – 1.82 (m, 1H), 1.73 – 1.53 (m, 1H). <sup>13</sup>C NMR (126 MHz, DMSO) δ 157.8, 157.7, 156.3, 154.2, 151.9, 133.9, 131.5, 124.7, 119.7, 118.0, 89.7, 47.9, 47.9, 44.9, 38.3, 28.0.

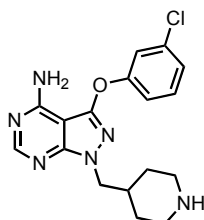

**13: 3-(3-chlorophenoxy)-1-(piperidin-4-ylmethyl)-1H-pyrazolo[3,4-d]pyrimidin-4-amine.** Compound is synthesized from **2** followed by *Process D* and then *Process E* with tert-butyl 4-(bromomethyl)piperidine-1-carboxylate or tert-butyl 4-methylsulfonyloxymethyl-1-piperidinecarboxylate as the R<sub>2</sub>-halide or R<sub>2</sub>-mesylate respectively. Alternatively, the compound can be synthesized by using intermediate **i6** followed by alkylation (*Process E*) with tert-butyl 4-(bromomethyl)piperidine-1-carboxylate or tert-butyl 4-methylsulfonyloxymethyl-1-piperidinecarboxylate as the R<sub>2</sub>-halide or R<sub>2</sub>-mesylate respectively followed by coupling using *Process A* with 3-chlorophenol as the alcohol. Boc deprotection follows to obtain the final product. ESI-MS (ESI+) calcd for C<sub>17</sub>H<sub>19</sub>ClN<sub>6</sub>O (M+H)<sup>+</sup> 359.1309, found 359.1375. <sup>1</sup>H NMR (400 MHz, DMSO-*d*<sub>6</sub>) δ 8.13 (s, 1H), 7.46 (t, *J* = 2.2 Hz, 1H), 7.38 (t, *J* = 8.1 Hz, 1H), 7.31 (ddd, *J* = 8.3, 2.4, 1.1 Hz, 1H), 7.20 (dt, *J* = 8.0, 1.5 Hz, 1H), 4.04 (s, 2H), 3.15 (dt, *J* = 13.0, 3.5 Hz, 2H), 2.73 (td, *J* = 12.7, 3.0 Hz, 2H), 2.04 (dtt, *J* = 14.9, 7.1, 2.9 Hz, 1H), 1.64 – 1.49 (m, 2H), 1.28 (qd, *J* = 12.6, 4.0 Hz, 2H). <sup>13</sup>C NMR (100 MHz, DMSO) δ 157.8, 157.7, 156.3, 154.4, 151.7, 133.9, 131.5, 124.6, 119.6, 117.9, 89.6, 50.8, 43.2, 34.3, 26.6.

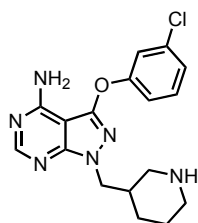

**14: 3-(3-chlorophenoxy)-1-(piperidin-3-ylmethyl)-1H-pyrazolo[3,4-d]pyrimidin-4-amine.**

Compound is synthesized from **2** followed by *Process D* and then *Process E* with tert-butyl 3-(bromomethyl)piperidine-1-carboxylate as the R<sub>2</sub>-halide. Alternatively, the compound can be synthesized by using intermediate **i6** followed by alkylation (*Process E*) with tert-butyl 3-(bromomethyl)piperidine-1-carboxylate as the R<sub>2</sub>-halide followed by coupling using *Process A* with 3-chlorophenol as the alcohol. Boc deprotection follows to obtain the final product. ESI-MS (ESI+) calcd for C<sub>17</sub>H<sub>19</sub>ClN<sub>6</sub>O (M+H)<sup>+</sup> 359.1309, found 359.1375. <sup>1</sup>H NMR (400 MHz, DMSO-*d*<sub>6</sub>) δ 8.13 (s, 1H), 7.46 (t, *J* = 2.1 Hz, 1H), 7.43 – 7.30 (m, 2H), 7.20 (dt, *J* = 7.8, 1.6 Hz, 1H), 4.15 – 3.97 (m, 2H), 3.13 – 2.90 (m, 2H), 2.71 – 2.49 (m, 2H), 2.15 (td, *J* = 7.9, 4.2 Hz, 1H), 1.74 – 1.37 (m, 3H), 1.21 – 1.05 (m, 1H). <sup>13</sup>C NMR (126 MHz, DMSO) δ 157.8, 157.7, 156.3, 154.4, 151.8, 133.9, 131.5, 124.7, 119.6, 118.0, 89.7, 48.9, 46.5, 43.8, 34.7, 26.2, 22.1.

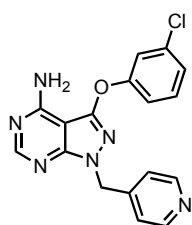

**15: 3-(3-chlorophenoxy)-1-(pyridin-4-ylmethyl)-1H-pyrazolo[3,4-d]pyrimidin-4-amine.**

Compound is synthesized from **2** followed by *Process D* and then *Process E* with 4-(Bromomethyl)pyridine as the R<sub>2</sub>-halide. Alternatively, the compound can be synthesized by using intermediate **i6** followed by alkylation (*Process E*) with 4-(Bromomethyl)pyridine as the R<sub>2</sub>-halide followed by coupling using *Process A* with 3-chlorophenol as the alcohol. ESI-MS (ESI+) calcd for C<sub>17</sub>H<sub>13</sub>ClN<sub>6</sub>O (M+H)<sup>+</sup> 353.0839, found 353.0908. <sup>1</sup>H NMR (400 MHz, DMSO-*d*<sub>6</sub>) δ 8.42 (d, *J* = 5.0 Hz, 2H), 8.15 (s, 1H), 7.45 (t, *J* = 2.1 Hz, 1H), 7.40 – 7.29 (m, 2H), 7.19 (dt, *J* = 7.8, 1.8 Hz, 1H), 7.08 – 7.01 (m, 2H), 5.38 (s, 2H). <sup>13</sup>C NMR (126 MHz, DMSO) δ 158.0, 157.8, 156.2, 154.6, 152.4, 150.3, 146.5, 133.9, 131.5, 124.8, 122.4, 119.7, 118.1, 89.9, 48.7.

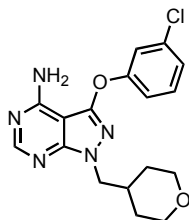

**16: 3-(3-chlorophenoxy)-1-((tetrahydro-2H-pyran-4-yl)methyl)-1H-pyrazolo[3,4-d]pyrimidin-4-amine.** Compound is synthesized from **2** followed by *Process D* and then *Process E* with 4-(Bromomethyl)tetrahydropyran as the R<sub>2</sub>-halide. Alternatively, the compound can be synthesized by using intermediate **i6** followed by alkylation (*Process E*) with 4-(Bromomethyl)tetrahydropyran as the R<sub>2</sub>-halide followed by coupling using *Process A* with 3-chlorophenol as the alcohol. ESI-MS (ESI+) calcd for Chemical Formula: C<sub>17</sub>H<sub>18</sub>ClN<sub>5</sub>O<sub>2</sub> (M+H)<sup>+</sup> 360.1149, found 360.1219. <sup>1</sup>H NMR (400 MHz, DMSO-*d*<sub>6</sub>) δ 8.12 (s, 1H), 7.50 – 7.26 (m, 3H), 7.19 (dt, *J* = 8.0, 1.4 Hz, 1H), 4.00 (d, *J* = 7.1 Hz, 2H), 3.73 (ddd, *J* = 11.5, 4.5, 1.9 Hz, 2H), 3.15 (td, *J* = 11.7, 2.1 Hz, 2H), 2.00 (ddq, *J* = 11.3, 7.8, 3.9 Hz, 1H), 1.32 (dd, *J* = 13.8, 3.3 Hz, 2H), 1.16 (qd, *J* = 12.0, 4.4 Hz, 2H). <sup>13</sup>C NMR (100 MHz, DMSO) δ 157.7, 157.6, 156.5, 154.3, 151.4, 133.9, 131.5, 124.5, 119.5, 117.8, 89.6, 66.9, 51.6, 35.6, 30.5.

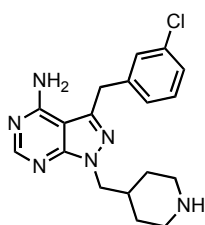

**17: 3-(3-chlorobenzyl)-1-(piperidin-4-ylmethyl)-1H-pyrazolo[3,4-d]pyrimidin-4-amine.** Compound is synthesized from **1** followed by *Process D* and then *Process E* with tert-butyl 4-(bromomethyl)piperidine-1-carboxylate or tert-butyl 4-methylsulfonyloxymethyl-1-piperidinecarboxylate as the R<sub>2</sub>-halide or R<sub>2</sub>-mesylate respectively. Boc deprotection follows to obtain the final product. ESI-MS (ESI+) calcd for C<sub>18</sub>H<sub>21</sub>ClN<sub>6</sub> (M+H)<sup>+</sup> 357.1516, found 357.1583. <sup>1</sup>H NMR (400 MHz, DMSO-*d*<sub>6</sub>) δ 8.08 (d, *J* = 2.3 Hz, 1H), 7.28 – 7.21 (m, 2H), 7.19 (dd, *J* = 8.2, 1.8 Hz, 1H), 7.16 – 7.09 (m, 1H), 4.30 (s, 2H), 4.11 (d, *J* = 7.0 Hz, 2H), 3.15 (dt, *J* = 13.0, 3.3 Hz, 2H), 2.74 (td, *J* = 12.7, 2.9 Hz, 2H), 2.12 (dtd, *J* = 15.4, 7.7, 4.5 Hz, 1H), 1.54 (dd, *J* = 14.2, 3.6 Hz, 2H), 1.39 – 1.20 (m, 2H). <sup>13</sup>C NMR (100 MHz, DMSO) δ 158.5, 156.3, 155.0, 143.1, 142.0, 133.4, 130.7, 128.8, 127.6, 126.7, 98.6, 51.0, 43.3, 34.4, 33.1, 26.8.

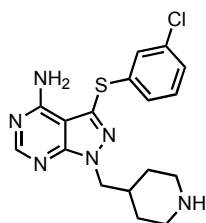

**18: 3-((3-chlorophenyl)thio)-1-(piperidin-4-ylmethyl)-1H-pyrazolo[3,4-d]pyrimidin-4-amine.** Compound is synthesized from **i7** using *Process C* with 3-chlorobenzenethiol as the thiol. Alkylation follows using *Process E* with tert-butyl 4-(bromomethyl)piperidine-1-carboxylate or tert-butyl 4-methylsulfonyloxymethyl-1-piperidinecarboxylate as the R<sub>2</sub>-halide or R<sub>2</sub>-mesylate respectively. Alternatively, alkylation of **i7** using *Process E* with tert-butyl 4-(bromomethyl)piperidine-1-carboxylate or tert-butyl 4-methylsulfonyloxymethyl-1-piperidinecarboxylate as the R<sub>2</sub>-halide or R<sub>2</sub>-mesylate respectively can precede coupling by *Process C* with 3-chlorobenzenethiol as the thiol. Boc deprotection follows to obtain the final product. ESI-MS (ESI<sup>+</sup>) calcd for C<sub>17</sub>H<sub>19</sub>ClN<sub>6</sub>S (M+H)<sup>+</sup> 375.1080, found 375.1148. <sup>1</sup>H NMR (400 MHz, DMSO-*d*<sub>6</sub>) δ 8.57 (d, *J* = 11.3 Hz, 1H), 8.26 (s, 1H), 7.32 – 7.22 (m, 3H), 7.13 (dt, *J* = 7.6, 1.7 Hz, 1H), 4.26 (d, *J* = 7.0 Hz, 2H), 3.19 (d, *J* = 12.4 Hz, 2H), 2.87 – 2.71 (m, 2H), 2.18 (ddp, *J* = 11.0, 7.2, 3.6 Hz, 1H), 1.64 – 1.54 (m, 2H), 1.33 (qd, *J* = 12.5, 4.0 Hz, 2H). <sup>13</sup>C NMR (100 MHz, DMSO) δ 159.1, 156.9, 155.2, 154.7, 137.4, 134.3, 131.6, 127.7, 127.4, 128.0, 101.8, 51.8, 43.1, 39.9, 39.5, 34.3, 26.4.

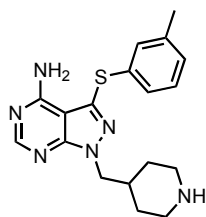

**19: 1-(piperidin-4-ylmethyl)-3-(*m*-tolylthio)-1H-pyrazolo[3,4-d]pyrimidin-4-amine.** Compound is synthesized from **i7** using *Process C* with 3-methylbenzenethiol (*m*-thiocresol) as the thiol. Alkylation follows using *Process E* with tert-butyl 4-(bromomethyl)piperidine-1-carboxylate or tert-butyl 4-methylsulfonyloxymethyl-1-piperidinecarboxylate as the R<sub>2</sub>-halide or R<sub>2</sub>-mesylate respectively. Alternatively, alkylation of **i7** using *Process E* with tert-butyl 4-(bromomethyl)piperidine-1-carboxylate or tert-butyl 4-methylsulfonyloxymethyl-1-piperidinecarboxylate as the R<sub>2</sub>-halide or R<sub>2</sub>-mesylate respectively can precede coupling by *Process C* with 3-methylbenzenethiol (*m*-thiocresol) as the thiol. Boc deprotection follows to obtain the final product. ESI-MS (ESI<sup>+</sup>) calcd for C<sub>18</sub>H<sub>22</sub>N<sub>6</sub>S (M+H)<sup>+</sup> 355.1627, found 355.1693. <sup>1</sup>H NMR (400 MHz, DMSO-*d*<sub>6</sub>) δ 8.17 (s, 1H), 7.14 (t, *J* = 7.6 Hz, 1H), 7.09 – 6.89 (m, 2H), 4.21 (d, *J* = 6.6 Hz, 1H), 3.14 (s, 2H), 2.72 (d, *J* = 12.8 Hz, 2H), 2.16 (s, 3H), 1.54 (d, *J* = 12.7 Hz, 2H), 1.37 – 1.21 (m, 3H). <sup>13</sup>C NMR (126 MHz, DMSO) δ 158.2, 157.1, 155.2, 139.4, 134.8, 134.1, 130.0, 128.8, 128.2, 125.5, 101.7, 51.7, 43.2, 34.6, 26.8, 21.3.

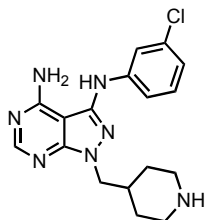

**20: *N*<sup>3</sup>-(3-chlorophenyl)-1-(piperidin-4-ylmethyl)-1*H*-pyrazolo[3,4-*d*]pyrimidine-3,4-diamine.** Compound is synthesized from **4** followed by *Process D* and then *Process E* with tert-butyl 4-(bromomethyl)piperidine-1-carboxylate or tert-butyl 4-methylsulfonyloxymethyl-1-piperidinecarboxylate as the R<sub>2</sub>-halide or R<sub>2</sub>-mesylate respectively. Alternatively, the compound can be synthesized by using an intermediate with N1 as -H (for example, intermediate **i6**) followed by alkylation (*Process E*) with tert-butyl 4-(bromomethyl)piperidine-1-carboxylate or tert-butyl 4-methylsulfonyloxymethyl-1-piperidinecarboxylate as the R<sub>2</sub>-halide or R<sub>2</sub>-mesylate respectively followed by coupling using *Process B* with 3-chloroaniline as the amine. Boc deprotection follows to obtain the final product. ESI-MS (ESI+) calcd for C<sub>17</sub>H<sub>20</sub>ClN<sub>7</sub> (M+H)<sup>+</sup> 358.1469, found 358.1537. <sup>1</sup>H NMR (400 MHz, DMSO-*d*<sub>6</sub>) δ 8.76 (s, 1H), 8.11 (s, 1H), 7.83 (t, *J* = 2.1 Hz, 1H), 7.62 (s, 2H), 7.58 (ddd, *J* = 8.3, 2.2, 0.9 Hz, 1H), 7.28 (t, *J* = 8.1 Hz, 1H), 6.89 (ddd, *J* = 7.9, 2.1, 0.9 Hz, 1H), 4.09 (d, *J* = 7.0 Hz, 2H), 3.14 – 3.02 (m, 2H), 2.64 (td, *J* = 12.4, 2.7 Hz, 2H), 2.08 (ddt, *J* = 11.4, 7.8, 3.8 Hz, 1H), 1.89 (s, 1H), 1.57 (d, *J* = 12.8 Hz, 2H), 1.27 (dd, *J* = 13.1, 3.8 Hz, 2H). <sup>13</sup>C NMR (126 MHz, DMSO-*d*<sub>6</sub>) δ 157.9, 156.7, 153.9, 144.3, 142.7, 133.6, 130.7, 119.8, 116.3, 115.6, 90.9, 51.1, 44.4, 35.5, 28.4.

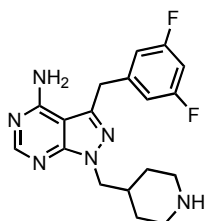

**21: 3-(3,5-difluorobenzyl)-1-(piperidin-4-ylmethyl)-1*H*-pyrazolo[3,4-*d*]pyrimidin-4-amine.** Compound is synthesized from **5** followed by *Process D* and then *Process E* with tert-butyl 4-(bromomethyl)piperidine-1-carboxylate or tert-butyl 4-methylsulfonyloxymethyl-1-piperidinecarboxylate as the R<sub>2</sub>-halide or R<sub>2</sub>-mesylate respectively. Boc deprotection follows to obtain the final product. ESI-MS (ESI+) calcd for C<sub>18</sub>H<sub>20</sub>F<sub>2</sub>N<sub>6</sub> (M+H)<sup>+</sup> 359.1718, found 359.1785. <sup>1</sup>H NMR (400 MHz, DMSO-*d*<sub>6</sub>) δ 8.15 (s, 1H), 7.06 (tt, *J* = 9.4, 2.4 Hz, 1H), 7.00 – 6.91 (m, 1H), 4.39 (s, 2H), 4.14 (d, *J* = 7.1 Hz, 2H), 3.10 – 2.95 (m, 2H), 2.16 – 1.96 (m, 1H), 1.46 (d, *J* = 13.0 Hz, 2H), 1.38 (d, *J* = 1.9 Hz, 1H), 1.28 – 1.09 (m, 2H). <sup>13</sup>C NMR (126 MHz, DMSO) δ 163.7, 161.7, 158.4, 156.3, 155.0, 142.3, 112.2, 112.0, 102.3, 98.5, 51.7, 44.7, 35.9, 33.1, 29.0.

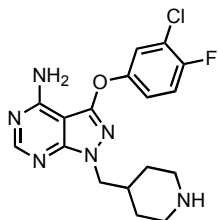

**22: 3-((3-chloro-4-fluorophenoxy)-1-(piperidin-4-ylmethyl)-1H-pyrazolo[3,4-d]pyrimidin-4-amine.** Compound is synthesized from **i3** using *Process A* with 3-chloro-4-fluorophenol as the alcohol followed by *Process D* and then *Process E* with tert-butyl 4-(bromomethyl)piperidine-1-carboxylate or tert-butyl 4-methylsulfonyloxymethyl-1-piperidinecarboxylate as the R<sub>2</sub>-halide or R<sub>2</sub>-mesylate respectively. Alternatively, the compound can be synthesized by using intermediate **i6** followed by alkylation (*Process E*) with tert-butyl 4-(bromomethyl)piperidine-1-carboxylate or tert-butyl 4-methylsulfonyloxymethyl-1-piperidinecarboxylate as the R<sub>2</sub>-halide or R<sub>2</sub>-mesylate respectively followed by coupling using *Process A* with 3-chloro-4-fluorophenol as the alcohol. Boc deprotection follows to obtain the final product. LC/MS (ES<sup>+</sup>) calcd for Chemical Formula: C<sub>17</sub>H<sub>18</sub>ClFN<sub>6</sub>O (M+H)<sup>+</sup> 377.1215, found 377.1282. <sup>1</sup>H NMR (400 MHz, DMSO-*d*<sub>6</sub>) δ 9.03 (s, 2H), 8.19 (s, 1H), 7.79 – 7.71 (m, 1H), 7.53 – 7.44 (m, 2H), 4.08 (d, *J* = 6.9 Hz, 2H), 3.18 (dt, *J* = 11.5, 2.9 Hz, 2H), 2.77 (td, *J* = 12.6, 3.0 Hz, 2H), 2.10 (dt, *J* = 7.5, 3.7 Hz, 1H), 1.61 (dd, *J* = 14.2, 3.5 Hz, 2H), 1.44 (tt, *J* = 12.2, 6.3 Hz, 2H). <sup>13</sup>C NMR (126 MHz, DMSO) δ 157.8, 157.7, 154.4, 152.0, 151.7, 121.8, 120.0, 120.0, 117.9, 117.7, 89.3, 50.8, 42.9, 34.3, 26.3.

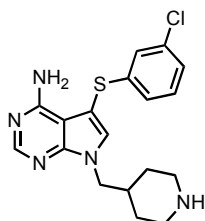

**23: 5-((3-chlorophenyl)thio)-7-(piperidin-4-ylmethyl)-7H-pyrrolo[2,3-d]pyrimidin-4-amine.** Compound is synthesized from **i8** using *Process C* with 3-chlorobenzenethiol as the thiol. Alkylation follows using *Process E* with tert-butyl 4-(bromomethyl)piperidine-1-carboxylate or tert-butyl 4-methylsulfonyloxymethyl-1-piperidinecarboxylate as the R<sub>2</sub>-halide or R<sub>2</sub>-mesylate respectively. Alternatively, alkylation of **i8** using *Process E* with tert-butyl 4-(bromomethyl)piperidine-1-carboxylate or tert-butyl 4-methylsulfonyloxymethyl-1-piperidinecarboxylate as the R<sub>2</sub>-halide or R<sub>2</sub>-mesylate respectively can precede coupling by *Process C* with 3-chlorobenzenethiol as the thiol. Boc deprotection follows to obtain the final product. ESI-MS (ESI<sup>+</sup>) calcd for C<sub>18</sub>H<sub>20</sub>ClN<sub>5</sub>S (M+H)<sup>+</sup> 374.1128, found 374.1197. <sup>1</sup>H NMR (400 MHz, DMSO-*d*<sub>6</sub>) δ 8.28 (s, 2H), 8.09 (s, 1H), 7.67 (s, 1H), 7.23 (t, *J* = 7.9 Hz, 1H), 7.14 (dd, *J* = 7.7, 2.0 Hz, 1H), 7.01 (t, *J* = 1.9 Hz, 1H), 6.99 – 6.94 (m, 1H), 4.04 (d, *J* = 7.2 Hz, 2H), 3.06 (d, *J* = 12.1 Hz, 2H), 2.58 (t, *J* = 11.9 Hz, 2H), 2.03 (s, 1H), 1.46 (d, *J* = 13.0 Hz, 2H), 1.30 – 1.14 (m, 2H). <sup>13</sup>C NMR (126 MHz, DMSO) δ 157.8, 153.1, 151.4, 141.9, 134.3, 133.8, 131.4, 126.0, 125.2, 124.6, 103.0, 96.8, 49.5, 43.7, 35.2, 27.6, 27.5.

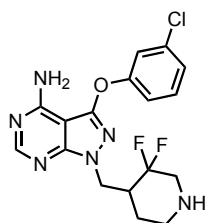

**24:** 3-(3-chlorophenoxy)-1-((3,3-difluoropiperidin-4-yl)methyl)-1H-pyrazolo[3,4-d]pyrimidin-4-amine. Compound is synthesized from **2** using *Process D* followed by *Process E* with 1-boc-3,3-difluoro-4-(bromomethyl)piperidine or 1-boc-3,3-difluoro-4-((methylsulfonyloxy)methyl)piperidine as the R<sub>2</sub>-halide or R<sub>2</sub>-mesylate respectively. Alternatively, the compound can be synthesized by using intermediate **i6** followed by alkylation (*Process E*) with 1-boc-3,3-difluoro-4-(bromomethyl)piperidine or 1-boc-3,3-difluoro-4-((methylsulfonyloxy)methyl)piperidine as the R<sub>2</sub>-halide or R<sub>2</sub>-mesylate respectively followed by coupling using *Process A* with 3-chlorophenol as the alcohol. Boc deprotection follows to obtain the final product. ESI-MS (ESI+) calcd for C<sub>17</sub>H<sub>17</sub>ClF<sub>2</sub>N<sub>6</sub>O (M+H)<sup>+</sup> 395.1120, found 395.1187. <sup>1</sup>H NMR (400 MHz, DMSO-*d*<sub>6</sub>) δ 8.13 (s, 1H), 7.48 – 7.26 (m, 3H), 7.19 (dd, *J* = 7.7, 1.9 Hz, 1H), 4.38 (dd, *J* = 14.1, 5.0 Hz, 1H), 4.12 (dd, *J* = 14.1, 9.2 Hz, 1H), 3.14 – 2.96 (m, 1H), 2.88 – 2.63 (m, 2H), 1.31 (ddd, *J* = 28.8, 10.4, 4.0 Hz, 2H), 1.10 (t, *J* = 7.3 Hz, 1H). <sup>13</sup>C NMR (126 MHz, DMSO) δ 157.7, 157.7, 156.4, 154.6, 151.6, 133.9, 131.5, 124.6, 119.4, 117.7, 89.8, 46.2, 43.7, 28.3, 28.3, 9.2.

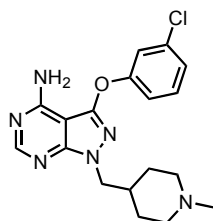

**25:** 3-(3-chlorophenoxy)-1-((1-methylpiperidin-4-yl)methyl)-1H-pyrazolo[3,4-d]pyrimidin-4-amine. Synthesis proceeds by reductive alkylation of 3-(3-chlorophenoxy)-1-(piperidin-4-ylmethyl)-1H-pyrazolo[3,4-d]pyrimidin-4-amine (**13**). In a 1 dram vial with magnetic stir bar, **13** (25mg, 0.070mmol) was dissolved in methanol (200uL). A solution of formaldehyde (52uL of 37%, 0.70mmol) in 2% acetic acid was added to the reaction and was stirred for 10 minutes at room temperature. Sodium cyanoborohydride (21.9mg, 0.349mmol) was added and the reaction was stirred for 3 hours at room temperature. Purification by RP-HPLC using acetonitrile – water in the presence of 0.1% formic acid yields. ESI-MS (ESI+) calcd for C<sub>18</sub>H<sub>21</sub>ClN<sub>6</sub>O (M+H)<sup>+</sup> 373.1465, found 373.1533 <sup>1</sup>H NMR (400 MHz, DMSO-*d*<sub>6</sub>) δ 8.10 (d, *J* = 3.9 Hz, 2H), 7.41 (t, *J* = 2.2 Hz, 1H), 7.35 (t, *J* = 8.1 Hz, 1H), 7.30 – 7.25 (m, 1H), 7.21 – 7.14 (m, 1H), 3.97 (d, *J* = 7.1 Hz, 2H), 2.74 (dt, *J* = 12.2, 3.6 Hz, 2H), 2.14 (s, 3H), 2.01 – 1.84 (m, 2H), 1.84 – 1.62 (m, 1H), 1.45 – 1.33 (m, 2H), 1.24 – 1.09 (m, 2H). <sup>13</sup>C NMR (126 MHz, DMSO) δ 164.6, 157.7, 156.4, 154.3, 151.5, 133.9, 131.5, 124.6, 119.5, 117.8, 89.6, 54.7, 51.3, 51.3, 45.6, 35.4, 29.0.

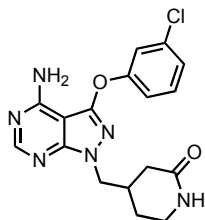

**26: 4-((4-amino-3-(3-chlorophenoxy)-1H-pyrazolo[3,4-d]pyrimidin-1-yl)methyl)piperidin-2-one.** Compound is synthesized from **2** using *Process D* followed by *Process E* with *tert*-butyl 4-(bromomethyl)-2-oxopiperidine-1-carboxylate (prepared from 4-(hydroxymethyl)piperidin-2-one) as the R<sub>2</sub>-halide. Alternatively, the compound can be synthesized by using intermediate **i6** followed by alkylation (*Process E*) with *tert*-butyl 4-(bromomethyl)-2-oxopiperidine-1-carboxylate (prepared from 4-(hydroxymethyl)piperidin-2-one) as the R<sub>2</sub>-halide followed by coupling using *Process A* with 3-chlorophenol as the alcohol. Boc deprotection follows to obtain the final product. ESI-MS (ESI+) calcd for C<sub>17</sub>H<sub>17</sub>ClN<sub>6</sub>O<sub>2</sub> (M+H)<sup>+</sup> 373.1102, found 373.1170. <sup>1</sup>H NMR (400 MHz, DMSO-*d*<sub>6</sub>) δ 8.13 (s, 1H), 7.45 (t, *J* = 2.2 Hz, 1H), 7.41 – 7.34 (m, 2H), 7.31 (dd, *J* = 8.2, 2.3 Hz, 1H), 7.22 – 7.17 (m, 1H), 4.05 (d, *J* = 7.0 Hz, 2H), 3.09 (ddt, *J* = 12.3, 6.2, 3.6 Hz, 1H), 2.98 (td, *J* = 11.4, 4.5 Hz, 1H), 2.32 – 2.18 (m, 1H), 2.01 (ddd, *J* = 17.3, 5.4, 1.5 Hz, 1H), 1.86 (dd, *J* = 17.3, 10.5 Hz, 1H), 1.58 (dd, *J* = 13.4, 3.8 Hz, 1H), 1.29 (d, *J* = 9.6 Hz, 1H). <sup>13</sup>C NMR (126 MHz, DMSO-*d*<sub>6</sub>) δ 170.2, 157.7, 157.6, 156.3, 154.3, 151.7, 133.9, 131.6, 124.7, 119.5, 117.9, 89.6, 50.4, 35.3, 33.5, 28.7, 25.7.

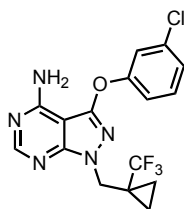

**27: 3-(3-chlorophenoxy)-1-((1-(trifluoromethyl)cyclopropyl)methyl)-1H-pyrazolo[3,4-d]pyrimidin-4-amine.** Compound is synthesized from **2** using *Process D* followed by *Process E* with 1-(Bromomethyl)-1-(trifluoromethyl)-cyclopropane as the R<sub>2</sub>-halide. Alternatively, the compound can be synthesized by using intermediate **i6** followed by alkylation (*Process E*) with 1-(Bromomethyl)-1-(trifluoromethyl)-cyclopropane as the R<sub>2</sub>-halide followed by coupling using *Process A* with 3-chlorophenol as the alcohol. ESI-MS (ESI+) calcd for Chemical Formula: C<sub>16</sub>H<sub>13</sub>ClF<sub>3</sub>N<sub>5</sub>O (M+H)<sup>+</sup> 384.0761, found 384.0831. <sup>1</sup>H NMR (400 MHz, DMSO-*d*<sub>6</sub>) δ 8.15 (s, 1H), 7.46 (t, *J* = 2.2 Hz, 1H), 7.39 (t, *J* = 8.1 Hz, 1H), 7.31 (dd, *J* = 8.2, 2.3 Hz, 1H), 7.23 – 7.16 (m, 1H), 4.38 (s, 2H), 1.05 (d, *J* = 5.3 Hz, 2H), 0.96 (t, *J* = 3.5 Hz, 2H). <sup>13</sup>C NMR (126 MHz, DMSO) δ 157.8, 157.7, 156.3, 154.5, 151.4, 133.9, 131.5, 124.5, 119.2, 117.6, 89.8, 47.2, 8.5.

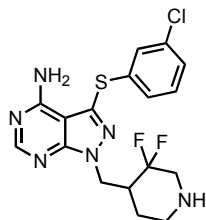

**28: 3-((3-chlorophenyl)thio)-1-((3,3-difluoropiperidin-4-yl)methyl)-1H-pyrazolo[3,4-d]pyrimidin-4-amine.** Compound is synthesized from **i7** using *Process C* with 3-chlorobenzenethiol as the thiol. Alkylation follows using *Process E* with 1-boc-3,3-difluoro-4-(bromomethyl)piperidine or 1-boc-3,3-difluoro-4-((methylsulfonyloxy)methyl)piperidine as the R<sub>2</sub>-halide or R<sub>2</sub>-mesylate respectively. Alternatively, alkylation of **i7** using *Process E* with 1-boc-3,3-difluoro-4-(bromomethyl)piperidine or 1-boc-3,3-difluoro-4-((methylsulfonyloxy)methyl)piperidine as the R<sub>2</sub>-halide or R<sub>2</sub>-mesylate respectively can precede coupling by *Process C* with 3-chlorobenzenethiol as the thiol. Boc deprotection follows to obtain the final product. ESI-MS (ESI+) calcd for C<sub>17</sub>H<sub>17</sub>ClF<sub>2</sub>N<sub>6</sub>S (M+H)<sup>+</sup> 411.0892, found 411.0960. <sup>1</sup>H NMR (400 MHz, DMSO-*d*<sub>6</sub>) δ 8.19 (s, 1H), 8.09 (s, 1H), 7.33 – 7.18 (m, 3H), 7.10 (dt, *J* = 7.6, 1.6 Hz, 1H), 4.61 (dd, *J* = 14.0, 5.3 Hz, 1H), 4.28 (dd, *J* = 14.0, 8.9 Hz, 1H), 2.96 (td, *J* = 12.6, 4.6 Hz, 1H), 2.83 – 2.51 (m, 3H), 1.30 (td, *J* = 10.7, 9.8, 3.8 Hz, 2H). <sup>13</sup>C NMR (126 MHz, DMSO-*d*<sub>6</sub>) δ 158.1, 157.2, 157.2, 155.3, 137.8, 134.3, 133.1, 131.5, 127.3, 127.2, 126.6, 101.9, 45.4, 43.9.

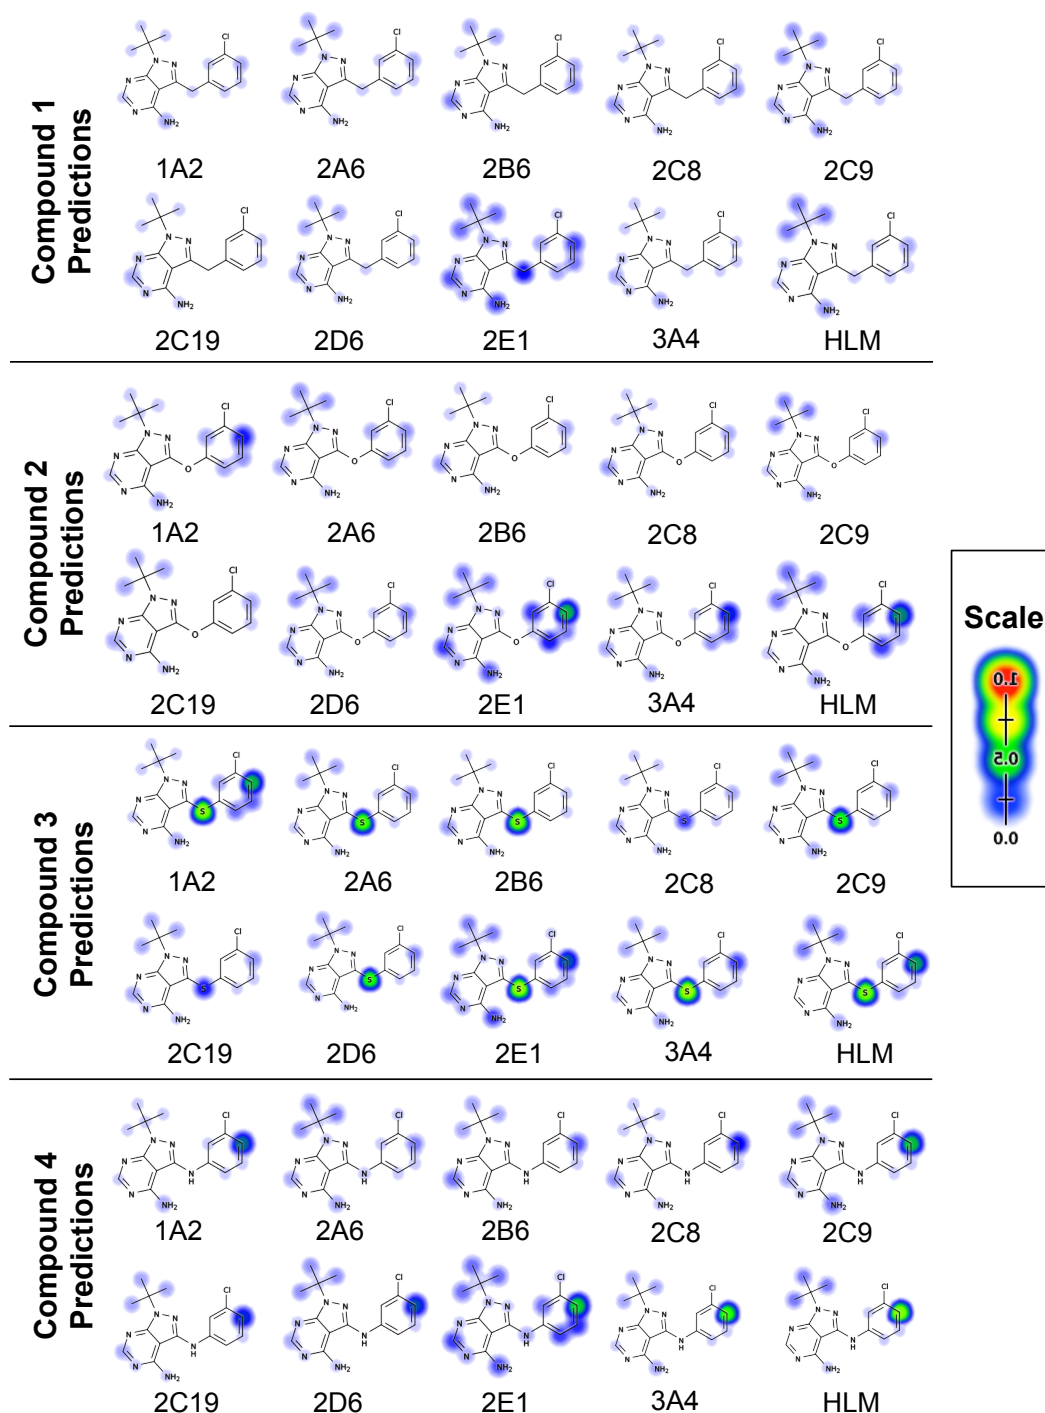

**Figure S1 XenoSite Analysis.** Results from XenoSite Cytochrome P450 Metabolism (v1.0)<sup>16,17</sup> analysis of compounds **1**, **2**, **3** and **4** predicts that the methylene linkage to C3 of the PP core, as in **1**, is subject to metabolism, particularly by CYP2E1. Metabolism at this position is less likely for ether and amine linkages as in **2** and **4** respectively. Thioether linkages such as in **3** are predicted to be highly metabolized by multiple CYP isozyms.

**Table S1. Crystallographic Details and Refinement characteristics**

|                                                                                            |                                             |                                                                                             |                                                                      |                                                                    |                                                                      |
|--------------------------------------------------------------------------------------------|---------------------------------------------|---------------------------------------------------------------------------------------------|----------------------------------------------------------------------|--------------------------------------------------------------------|----------------------------------------------------------------------|
| <b>PDB</b>                                                                                 | 4IHP                                        | 5W8R                                                                                        | 5W80                                                                 | 5W9E                                                               | 5W91                                                                 |
| <b>Ligand</b>                                                                              | 2                                           | 1                                                                                           | 13                                                                   | 3                                                                  | 4                                                                    |
| <b>Data Collection</b>                                                                     |                                             |                                                                                             |                                                                      |                                                                    |                                                                      |
| Space Group                                                                                | P21                                         | P21                                                                                         | P21                                                                  | P21                                                                | P21                                                                  |
| Cell Dimensions<br><i>a</i> , <i>b</i> , <i>c</i> (Å)<br>$\alpha$ , $\beta$ , $\gamma$ (°) | 48.3, 73.2, 149.3<br>90.0, 90.0, 90.0       | 48.0, 72.9, 65.5<br>90.0, 99.3, 90.0                                                        | 48.0, 72.8, 65.5<br>90.0, 99.5, 90.0                                 | 48.0, 72.8, 64.6<br>90.0, 98.6, 90.0                               | 47.9, 72.2, 64.2<br>90.0, 98.7, 90.0                                 |
| <b>Refinement</b>                                                                          |                                             |                                                                                             |                                                                      |                                                                    |                                                                      |
| Resolution (Å)                                                                             | 29.55 - 2.27                                | 48.40 - 2.20                                                                                | 48.33 – 2.00                                                         | 48.01 – 2.44                                                       | 47.65 – 2.30                                                         |
| R <sub>work</sub> / R <sub>free</sub>                                                      | 0.23 / 0.25                                 | 0.20 / 0.25                                                                                 | 0.19 / 0.24                                                          | 0.21 / 0.25                                                        | 0.25 / 0.31                                                          |
| No. atoms                                                                                  |                                             |                                                                                             |                                                                      |                                                                    |                                                                      |
| Protein                                                                                    | 3553                                        | 3584                                                                                        | 3600                                                                 | 3498                                                               | 3440                                                                 |
| Compound                                                                                   | 22                                          | 22                                                                                          | 25                                                                   | 22                                                                 | 21                                                                   |
| Water                                                                                      | 89                                          | 146                                                                                         | 249                                                                  | 70                                                                 | 105                                                                  |
| Average B-factors                                                                          | 45.4                                        | 53.5                                                                                        | 41.8                                                                 | 62.5                                                               | 55.9                                                                 |
| RMS deviations                                                                             |                                             |                                                                                             |                                                                      |                                                                    |                                                                      |
| Bond lengths (Å)                                                                           | 0.01                                        | 0.01                                                                                        | 0.01                                                                 | 0.01                                                               | 0.01                                                                 |
| Bond Angles (°)                                                                            | 1.39                                        | 0.75                                                                                        | 0.81                                                                 | 0.67                                                               | 0.82                                                                 |
| <b>Crystallization conditions</b>                                                          | 20% PEG3350, 0.2M potassium acetate, pH 7.5 | 25% PEG 3350, 0.2M sodium chloride, pH 7.5, 0.1M Hepes 7.5, 5% ethylene glycol, 5% glycerol | 25% PEG8000, 0.2M sodium chloride, 0.1M Hepes, pH 7.5, 10 % glycerol | 25% PEG8000, 0.2M sodium chloride, 0.1M Hepes, pH 7.5, 5% glycerol | 25% PEG8000, 0.2M sodium chloride, 0.1M Hepes, pH 7.5, 10 % glycerol |

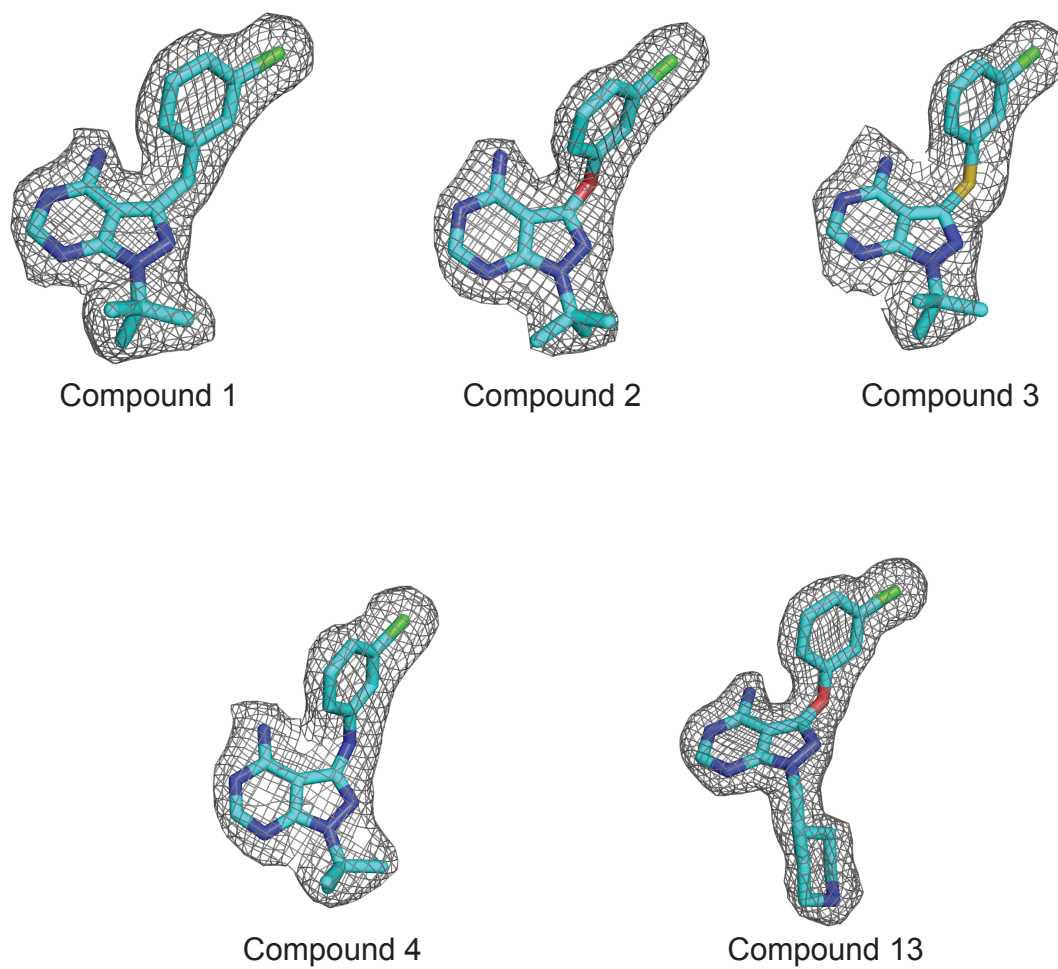

**Figure S2 Crystallography Difference Maps.** 2Fo-Fc omit maps (grey mesh,  $1\sigma$ ) of **1**, **2**, **3**, **4**, and **13**.

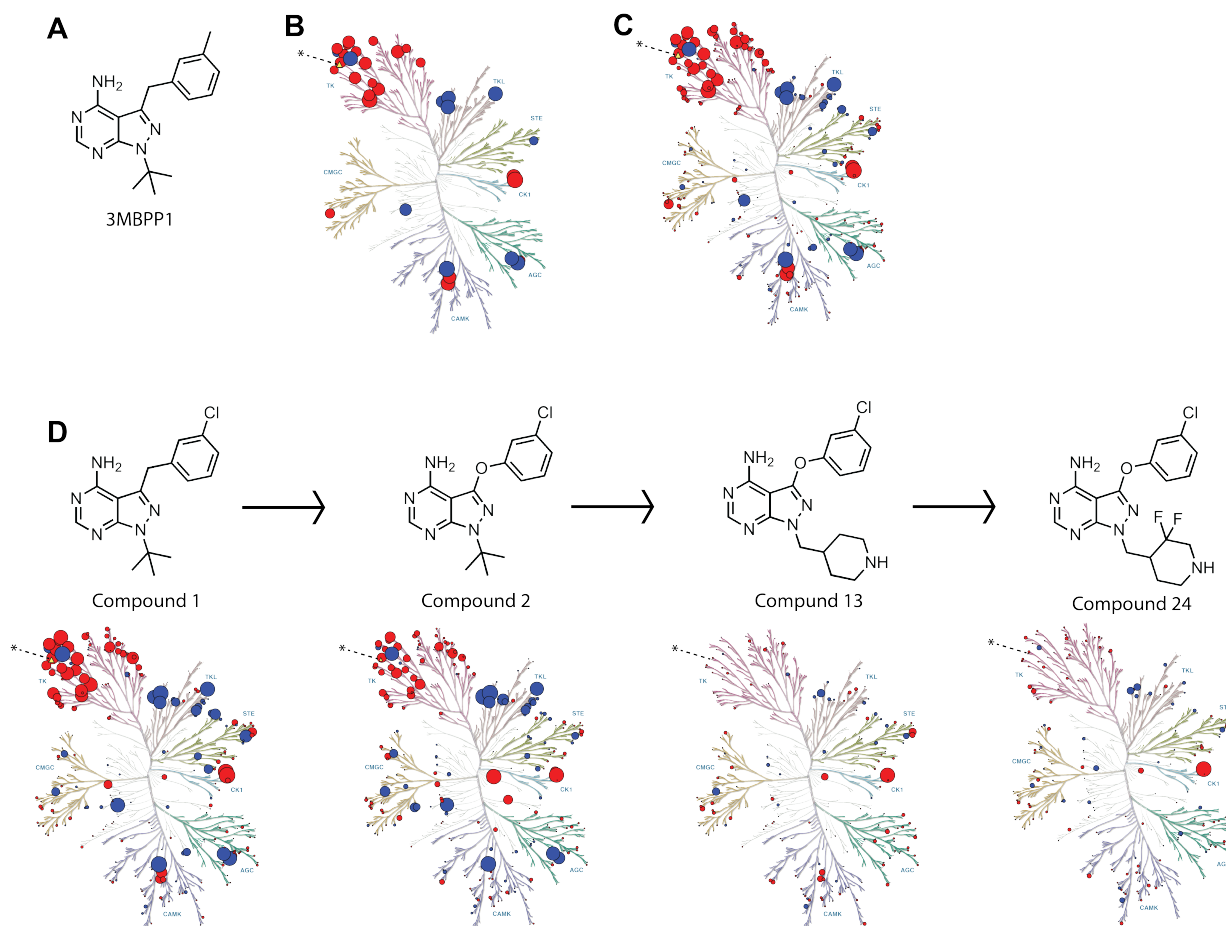

**Figure S3. Kinome Profiling for compounds 3MBPP1, 1, 2, 13 and 24.** (A) Structure of **3MBPP1**, a previously described TgCDPK1 inhibitor<sup>15</sup>. (B) Selectivity profile of **3MBPP1** for kinases that are inhibited by more than 50% or show greater than 50% tracer displacement. (C) Selectivity profile of **3MBPP1** for all kinases that are inhibited or show tracer displacement. (D) Selectivity profile of **1**, **2**, **13** and **24** for all kinases that are inhibited or show tracer displacement. For all trees, circle size reflects values obtained from ThermoFisher ACCESS kinase profiling for percent inhibition or displacement in the presence of compound and percentages are the mean of 2 data points. % inhibition value for Src is shown as a yellow triangle (emphasized by \* and dotted line). Kinome tree images were generated using KinMap<sup>18</sup> and the kinase tree illustration is reproduced courtesy of Cell Signaling Technology, Inc. (www.cellsignal.com). The full kinome profiling dataset is presented in supplementary tables S2-S4 (pages S26-S35).

**Table S2. CK1ε off-target inhibition by compounds 3MBPP1, 1, 2, 13 and 24.**

|                                      | CK1ε IC <sub>50</sub> (nM) |                   |                   |                    |                    |
|--------------------------------------|----------------------------|-------------------|-------------------|--------------------|--------------------|
| <b>[ATP] Tested</b>                  | <b>3MBPP1</b>              | <b>Compound 1</b> | <b>Compound 2</b> | <b>Compound 13</b> | <b>Compound 24</b> |
| K <sub>m</sub> <sub>app</sub> (2 μM) | 59.8                       | 25.3              | 49.7              | 115                | 78.2               |
| 100 μM                               | 838                        | 303               | 450               | 745                | 673                |

**Table S3. ThermoFisher Scientific Z'-LYTE Kinase Profiling**

| Kinase Tested         | [ATP]<br>Tested<br>( $\mu$ M) | 3MBPP1<br>(1 $\mu$ M)<br>% Inhibition<br>(mean of<br>2 points) | Compound 1<br>(1 $\mu$ M)<br>% Inhibition<br>(mean of<br>2 points) | Compound 2<br>(1 $\mu$ M)<br>% Inhibition<br>(mean of<br>2 points) | Compound 13<br>(1 $\mu$ M)<br>% Inhibition<br>(mean of<br>2 points) | Compound 24<br>(1 $\mu$ M)<br>% Inhibition<br>(mean of<br>2 points) |
|-----------------------|-------------------------------|----------------------------------------------------------------|--------------------------------------------------------------------|--------------------------------------------------------------------|---------------------------------------------------------------------|---------------------------------------------------------------------|
| ABL1 E255K            | Km app                        | 17                                                             | 28                                                                 | 20                                                                 | 1                                                                   | 2                                                                   |
| ABL1 F317I            | Km app                        | 18                                                             | 27                                                                 | 16                                                                 | 4                                                                   | 3                                                                   |
| ABL1 F317L            | Km app                        | 19                                                             | 34                                                                 | 16                                                                 | 2                                                                   | 2                                                                   |
| ABL1 G250E            | Km app                        | 25                                                             | 38                                                                 | 26                                                                 | 10                                                                  | 9                                                                   |
| ABL1 T315I            | Km app                        | 4                                                              | 4                                                                  | 6                                                                  | 1                                                                   | 0                                                                   |
| ABL1 Y253F            | Km app                        | 21                                                             | 36                                                                 | 20                                                                 | 3                                                                   | 3                                                                   |
| ABL1                  | Km app                        | 21                                                             | 35                                                                 | 31                                                                 | 1                                                                   | 8                                                                   |
| ABL2 (Arg)            | Km app                        | 21                                                             | 28                                                                 | 12                                                                 | 3                                                                   | 2                                                                   |
| ACVR1B (ALK4)         | Km app                        | 14                                                             | 16                                                                 | 11                                                                 | 6                                                                   | 1                                                                   |
| ADRBK1 (GRK2)         | Km app                        | 5                                                              | 5                                                                  | 0                                                                  | 1                                                                   | 1                                                                   |
| ADRBK2 (GRK3)         | Km app                        | 2                                                              | -3                                                                 | -1                                                                 | -3                                                                  | -2                                                                  |
| AKT1 (PKB alpha)      | Km app                        | 4                                                              | 2                                                                  | 2                                                                  | 2                                                                   | 4                                                                   |
| AKT2 (PKB beta)       | Km app                        | 17                                                             | 4                                                                  | 7                                                                  | 8                                                                   | 7                                                                   |
| AKT3 (PKB gamma)      | Km app                        | 4                                                              | 6                                                                  | -2                                                                 | -1                                                                  | 2                                                                   |
| ALK                   | Km app                        | 3                                                              | 1                                                                  | -2                                                                 | -2                                                                  | -2                                                                  |
| AMPK (A1/B2/G2)       | Km app                        | 8                                                              | 10                                                                 | 6                                                                  | 3                                                                   | 0                                                                   |
| AMPK (A1/B2/G3)       | Km app                        | 9                                                              | 9                                                                  | 0                                                                  | 1                                                                   | 1                                                                   |
| AMPK (A2/B1/G2)       | Km app                        | 7                                                              | 6                                                                  | 5                                                                  | 6                                                                   | 5                                                                   |
| AMPK (A2/B1/G3)       | Km app                        | 6                                                              | 5                                                                  | 2                                                                  | 4                                                                   | 3                                                                   |
| AMPK (A2/B2/G3)       | Km app                        | 9                                                              | 9                                                                  | 3                                                                  | 4                                                                   | 3                                                                   |
| AMPK A1/B1/G1         | Km app                        | 5                                                              | 8                                                                  | 5                                                                  | -2                                                                  | 3                                                                   |
| AMPK A2/B1/G1         | Km app                        | 5                                                              | 7                                                                  | 10                                                                 | 10                                                                  | 7                                                                   |
| AURKA (Aurora A)      | Km app                        | 8                                                              | 2                                                                  | 25                                                                 | 5                                                                   | 13                                                                  |
| AURKB (Aurora B)      | Km app                        | 11                                                             | 4                                                                  | 4                                                                  | 6                                                                   | 3                                                                   |
| AURKC (Aurora C)      | Km app                        | 9                                                              | 11                                                                 | -3                                                                 | 3                                                                   | -6                                                                  |
| AXL                   | Km app                        | 8                                                              | 8                                                                  | 5                                                                  | 0                                                                   | 1                                                                   |
| BLK                   | Km app                        | 21                                                             | 12                                                                 | 5                                                                  | 6                                                                   | 2                                                                   |
| BMX                   | Km app                        | 38                                                             | 48                                                                 | 32                                                                 | 3                                                                   | 29                                                                  |
| BRAF V599E            | 100                           | 26                                                             | 34                                                                 | 14                                                                 | 8                                                                   | 10                                                                  |
| BRAF                  | 100                           | -3                                                             | 0                                                                  | -2                                                                 | -3                                                                  | -9                                                                  |
| BRSK1 (SAD1)          | Km app                        | 9                                                              | 8                                                                  | 5                                                                  | 11                                                                  | 11                                                                  |
| BTK                   | Km app                        | 33                                                             | 41                                                                 | 22                                                                 | 6                                                                   | 13                                                                  |
| CAMK1D (CaMKI delta)  | Km app                        | 6                                                              | 6                                                                  | 3                                                                  | 3                                                                   | 2                                                                   |
| CAMK1G (CaMKI gamma)  | Km app                        | 11                                                             | 15                                                                 | 3                                                                  | 1                                                                   | -1                                                                  |
| CAMK2A (CaMKII alpha) | Km app                        | -1                                                             | 1                                                                  | 0                                                                  | 1                                                                   | 2                                                                   |
| CAMK2B (CaMKII beta)  | Km app                        | 5                                                              | 9                                                                  | -2                                                                 | -3                                                                  | 1                                                                   |
| CAMK2D (CaMKII delta) | Km app                        | 13                                                             | 7                                                                  | 7                                                                  | 13                                                                  | 14                                                                  |
| CAMK4 (CaMKIV)        | Km app                        | 5                                                              | 8                                                                  | 8                                                                  | 11                                                                  | -3                                                                  |
| CDC42 BPA (MRCKA)     | Km app                        | 7                                                              | 10                                                                 | 2                                                                  | 0                                                                   | 5                                                                   |
| CDC42 BPB (MRCKB)     | Km app                        | 4                                                              | 6                                                                  | 1                                                                  | 1                                                                   | -3                                                                  |
| CDC42 BPG (MRCKG)     | Km app                        | 3                                                              | 5                                                                  | 1                                                                  | 1                                                                   | 1                                                                   |
| CDK1/cyclin B         | Km app                        | 5                                                              | 5                                                                  | 4                                                                  | 3                                                                   | 4                                                                   |
| CDK17/cyclin Y        | Km app                        | 11                                                             | 11                                                                 | 4                                                                  | 3                                                                   | 3                                                                   |
| CDK18/cyclin Y        | Km app                        | 7                                                              | 10                                                                 | 5                                                                  | 3                                                                   | 3                                                                   |
| CDK2/cyclin A         | Km app                        | 11                                                             | 9                                                                  | 6                                                                  | 5                                                                   | 6                                                                   |
| CDK5/p25              | Km app                        | 3                                                              | 14                                                                 | 8                                                                  | 7                                                                   | 9                                                                   |
| CDK5/p35              | Km app                        | 14                                                             | 15                                                                 | 11                                                                 | 5                                                                   | 7                                                                   |
| CDKL5                 | Km app                        | 10                                                             | 12                                                                 | 2                                                                  | 1                                                                   | 0                                                                   |
| CHEK1 (CHK1)          | Km app                        | 5                                                              | 3                                                                  | 5                                                                  | 3                                                                   | -1                                                                  |
| CHEK2 (CHK2)          | Km app                        | 8                                                              | 3                                                                  | 5                                                                  | 4                                                                   | 11                                                                  |
| CLK1                  | Km app                        | 7                                                              | 12                                                                 | 8                                                                  | 2                                                                   | 5                                                                   |
| CLK2                  | Km app                        | 13                                                             | 19                                                                 | 38                                                                 | 10                                                                  | 14                                                                  |
| CLK3                  | Km app                        | 12                                                             | 8                                                                  | 14                                                                 | 1                                                                   | 10                                                                  |
| CSF1R (FMS)           | Km app                        | 11                                                             | 10                                                                 | 16                                                                 | 0                                                                   | 13                                                                  |

|                                |        |    |    |     |    |    |
|--------------------------------|--------|----|----|-----|----|----|
| CSK                            | Km app | 26 | 26 | 3   | -1 | 2  |
| CSNK1A1 (CK1 alpha 1)          | Km app | 34 | 47 | 12  | 20 | 13 |
| CSNK1A1L                       | Km app | 16 | 29 | 3   | 8  | 3  |
| CSNK1D (CK1 delta)             | Km app | 83 | 91 | 57  | 43 | 32 |
| CSNK1E (CK1 epsilon) R178C     | Km app | 93 | 97 | 91  | 91 | 92 |
| CSNK1E (CK1 epsilon)           | Km app | 92 | 93 | 86  | 86 | 89 |
| CSNK1G1 (CK1 gamma 1)          | Km app | -4 | 1  | -3  | 10 | 2  |
| CSNK1G2 (CK1 gamma 2)          | Km app | 14 | 7  | 3   | 2  | 4  |
| CSNK1G3 (CK1 gamma 3)          | Km app | 3  | 9  | 1   | 2  | 5  |
| CSNK2A1 (CK2 alpha 1)          | Km app | 2  | 1  | -13 | -6 | -1 |
| CSNK2A2 (CK2 alpha 2)          | Km app | 1  | -5 | 0   | -1 | 0  |
| DAPK3 (ZIPK)                   | Km app | 5  | 8  | 2   | 0  | -2 |
| DCAMKL1 (DCLK1)                | Km app | 3  | 4  | 0   | -2 | -4 |
| DCAMKL2 (DCK2)                 | Km app | 10 | 8  | 6   | 6  | 5  |
| DNA-PK                         | Km app | 9  | 2  | 5   | 3  | 8  |
| DYRK1A                         | Km app | 2  | 3  | 3   | 3  | 4  |
| DYRK1B                         | Km app | 12 | 5  | 1   | 3  | 4  |
| DYRK3                          | Km app | 16 | 4  | 5   | 0  | 7  |
| DYRK4                          | Km app | 5  | 4  | 1   | 1  | 0  |
| EEF2K                          | Km app | 1  | -1 | -3  | 3  | -1 |
| EGFR (ErbB1) C797S             | Km app | 61 | 81 | 51  | 3  | -1 |
| EGFR (ErbB1) G719C             | Km app | 62 | 77 | 38  | 0  | 1  |
| EGFR (ErbB1) G719S             | Km app | 80 | 86 | 62  | 1  | 1  |
| EGFR (ErbB1) L858R             | Km app | 37 | 72 | 35  | 0  | 8  |
| EGFR (ErbB1) L861Q             | Km app | 50 | 78 | 43  | 0  | 5  |
| EGFR (ErbB1) T790M C797S L858R | Km app | 49 | 62 | 25  | 1  | 4  |
| EGFR (ErbB1) T790M L858R       | Km app | 72 | 82 | 43  | 5  | 10 |
| EGFR (ErbB1) T790M             | Km app | 66 | 74 | 29  | -1 | 4  |
| EGFR (ErbB1)                   | Km app | 56 | 71 | 44  | -1 | 11 |
| EPHA1                          | Km app | 73 | 81 | 61  | 12 | 14 |
| EPHA2                          | Km app | 54 | 59 | 40  | 2  | 6  |
| EPHA4                          | Km app | 60 | 68 | 36  | 3  | 6  |
| EPHA5                          | Km app | 64 | 70 | 40  | 1  | 0  |
| EPHA8                          | Km app | 48 | 65 | 41  | -7 | -6 |
| EPHB1                          | Km app | 52 | 60 | 40  | 4  | 7  |
| EPHB2                          | Km app | 72 | 84 | 62  | 4  | 11 |
| EPHB3                          | Km app | 61 | 69 | 48  | 6  | 6  |
| EPHB4                          | Km app | 73 | 75 | 43  | 2  | 5  |
| ERBB2 (HER2)                   | Km app | 27 | 24 | 8   | 2  | 0  |
| ERBB4 (HER4)                   | Km app | 43 | 36 | 20  | -4 | 3  |
| FER                            | Km app | 20 | 30 | 17  | 12 | 16 |
| FES (FPS)                      | Km app | 12 | 9  | 4   | 1  | -3 |
| FGFR1                          | Km app | 43 | 27 | 18  | 6  | 8  |
| FGFR2 N549H                    | Km app | 16 | 14 | 6   | -5 | 0  |
| FGFR2                          | Km app | 26 | 26 | 10  | -1 | -2 |
| FGFR3 K650E                    | Km app | 21 | 22 | 10  | 10 | -1 |
| FGFR3 V555M                    | Km app | -1 | 3  | 10  | -1 | -3 |
| FGFR3                          | Km app | 2  | 3  | 3   | -1 | -4 |
| FGFR4                          | Km app | 23 | 18 | 12  | 3  | -4 |
| FGR                            | Km app | 70 | 77 | 61  | 14 | 17 |
| FLT1 (VEGFR1)                  | Km app | 9  | 1  | 0   | -3 | 1  |
| FLT3 D835Y                     | Km app | 12 | 10 | 13  | 8  | 8  |
| FLT3                           | Km app | 27 | 41 | 58  | 8  | 14 |
| FLT4 (VEGFR3)                  | Km app | 40 | 35 | 17  | -5 | -1 |
| FRAP1 (mTOR)                   | Km app | 6  | 4  | 4   | 0  | 13 |
| FRK (PTK5)                     | Km app | 66 | 73 | 43  | -2 | 1  |
| FYN                            | Km app | 47 | 60 | 39  | 8  | 9  |
| GRK4                           | Km app | -5 | 6  | -1  | -9 | -7 |
| GRK5                           | Km app | 2  | 3  | 1   | 0  | -1 |
| GRK6                           | Km app | 3  | 6  | 0   | 1  | -1 |

|                           |        |    |    |    |     |    |
|---------------------------|--------|----|----|----|-----|----|
| GRK7                      | Km app | 2  | 3  | -1 | 3   | -1 |
| GSK3A (GSK3 alpha)        | Km app | 8  | 5  | 7  | 14  | 9  |
| GSK3B (GSK3 beta)         | Km app | 11 | 4  | 5  | 3   | 7  |
| HCK                       | Km app | 24 | 33 | 26 | 7   | 11 |
| HIPK1 (Myak)              | Km app | 6  | 2  | 0  | -2  | -1 |
| HIPK2                     | Km app | 5  | 4  | 3  | 3   | 3  |
| HIPK3 (YAK1)              | Km app | 7  | 6  | 5  | 6   | 6  |
| HIPK4                     | Km app | 7  | 12 | 6  | 1   | 1  |
| IGF1R                     | Km app | 9  | 1  | -1 | -1  | 1  |
| IKBKB (IKK beta)          | Km app | 10 | 3  | 2  | 2   | 3  |
| IKBKE (IKK epsilon)       | Km app | 5  | 4  | 0  | 0   | 3  |
| INSR                      | Km app | 10 | 7  | 3  | 2   | 3  |
| INSRR (IRR)               | Km app | 8  | -2 | -3 | -2  | 1  |
| IRAK4                     | Km app | 5  | -3 | 3  | -1  | -6 |
| ITK                       | Km app | 4  | 1  | 1  | 1   | 3  |
| JAK1                      | Km app | 0  | 0  | 1  | -1  | -1 |
| JAK2 JH1 JH2 V617F        | Km app | 5  | -8 | 2  | -12 | -5 |
| JAK2 JH1 JH2              | Km app | -2 | 4  | 0  | -3  | -2 |
| JAK2                      | Km app | 0  | 2  | 0  | -5  | -4 |
| JAK3                      | Km app | 0  | 1  | -1 | 1   | -3 |
| KDR (VEGFR2)              | Km app | 52 | 30 | 22 | 3   | 7  |
| KIT T670I                 | Km app | 7  | 25 | 2  | 5   | 2  |
| KIT V559D V654A           | Km app | 4  | 7  | -3 | -5  | 0  |
| KIT V559D                 | Km app | 12 | 8  | 3  | 1   | 0  |
| KIT V560G                 | Km app | 8  | 8  | 4  | -2  | -1 |
| KIT                       | Km app | 19 | -1 | 3  | 3   | 7  |
| KSR2                      | Km app | 5  | 5  | 1  | 0   | 0  |
| LCK                       | Km app | 23 | 38 | 36 | 7   | 9  |
| LTK (TYK1)                | Km app | 9  | 4  | 4  | 3   | 10 |
| LYN A                     | Km app | 50 | 55 | 29 | 11  | 13 |
| LYN B                     | Km app | 54 | 59 | 30 | 6   | 11 |
| MAP2K1 (MEK1)             | 100    | 7  | 1  | -1 | -4  | 1  |
| MAP2K2 (MEK2)             | 100    | 19 | 25 | 11 | 10  | 11 |
| MAP2K6 (MKK6)             | 100    | 16 | 14 | 7  | 10  | 4  |
| MAP3K19 (YSK4)            | Km app | -3 | 3  | 0  | 0   | -1 |
| MAP3K8 (COT)              | 100    | 7  | 9  | -4 | -4  | -7 |
| MAP3K9 (MLK1)             | Km app | 8  | 1  | 6  | -1  | 3  |
| MAP4K2 (GCK)              | Km app | 10 | 7  | 8  | 4   | 4  |
| MAP4K4 (HGK)              | Km app | 26 | 53 | 27 | 44  | 42 |
| MAP4K5 (KHS1)             | Km app | 30 | 36 | 20 | 16  | 13 |
| MAPK1 (ERK2)              | Km app | 4  | 1  | 0  | -2  | 1  |
| MAPK10 (JNK3)             | 100    | 9  | 2  | 3  | 1   | -1 |
| MAPK11 (p38 beta)         | Km app | 21 | 22 | 16 | 15  | 8  |
| MAPK12 (p38 gamma)        | Km app | 10 | 6  | 6  | 5   | 7  |
| MAPK13 (p38 delta)        | Km app | 6  | -1 | 0  | -1  | 1  |
| MAPK14 (p38 alpha) Direct | Km app | 57 | 17 | 14 | 30  | 20 |
| MAPK14 (p38 alpha)        | 100    | 23 | 19 | 16 | 39  | 11 |
| MAPK3 (ERK1)              | Km app | 10 | 16 | 8  | 8   | 4  |
| MAPK7 (ERK5)              | Km app | 3  | 3  | -2 | -2  | -1 |
| MAPK8 (JNK1)              | 100    | 14 | 8  | 7  | 0   | 3  |
| MAPK9 (JNK2)              | 100    | 11 | -4 | -3 | -10 | -6 |
| MAPKAPK2                  | Km app | 10 | 2  | 7  | 3   | 0  |
| MAPKAPK3                  | Km app | 3  | 4  | 2  | 2   | 1  |
| MAPKAPK5 (PRAK)           | Km app | 7  | 3  | 3  | 3   | 5  |
| MARK1 (MARK)              | Km app | 9  | 4  | 4  | 4   | 2  |
| MARK2                     | Km app | 5  | 4  | 2  | 3   | 0  |
| MARK3                     | Km app | 6  | 2  | 4  | 8   | 5  |
| MARK4                     | Km app | 7  | 8  | 1  | 1   | -1 |
| MATK (HYL)                | Km app | 10 | 11 | 1  | 2   | -2 |
| MELK                      | Km app | 18 | 10 | 10 | 5   | 14 |
| MERTK (cMER)              | Km app | 17 | 15 | 11 | 5   | 3  |

|                      |        |    |     |     |    |    |
|----------------------|--------|----|-----|-----|----|----|
| MET (cMet) Y1235D    | Km app | 0  | 3   | 0   | -1 | -2 |
| MET (cMet)           | Km app | 7  | -10 | 6   | -8 | 6  |
| MET M1250T           | Km app | 7  | 10  | 1   | 4  | 7  |
| MINK1                | Km app | 15 | 25  | 19  | 32 | 28 |
| MKNK1 (MNK1)         | Km app | 4  | 2   | 3   | -2 | 3  |
| MST1R (RON)          | Km app | 2  | 4   | -3  | -1 | -3 |
| MST4                 | Km app | 21 | 14  | 10  | 11 | 12 |
| MUSK                 | Km app | 12 | 17  | 16  | 4  | 0  |
| MYLK2 (skMLCK)       | Km app | 1  | -5  | -2  | -3 | -3 |
| NEK1                 | Km app | 10 | 16  | 8   | 7  | 5  |
| NEK2                 | Km app | 5  | 8   | 3   | 6  | 3  |
| NEK4                 | Km app | 5  | 8   | 1   | 1  | 0  |
| NEK6                 | Km app | 12 | 6   | 7   | 8  | 4  |
| NEK7                 | Km app | 9  | 7   | 8   | 9  | 8  |
| NEK9                 | Km app | 5  | 5   | 3   | 8  | 1  |
| NIM1K                | Km app | 7  | 6   | 2   | 2  | 1  |
| NTRK1 (TRKA)         | Km app | 31 | 7   | 11  | 17 | 11 |
| NTRK2 (TRKB)         | Km app | 55 | 43  | 27  | 4  | 5  |
| NTRK3 (TRKC)         | Km app | 46 | 18  | 34  | 2  | 9  |
| PAK1                 | Km app | 11 | 15  | 12  | 5  | 13 |
| PAK2 (PAK65)         | Km app | 9  | 9   | 5   | 8  | 7  |
| PAK3                 | Km app | 12 | 7   | -12 | 3  | 0  |
| PAK4                 | Km app | 2  | -2  | 0   | -1 | 2  |
| PAK6                 | Km app | 9  | 15  | 10  | 13 | 10 |
| PAK7 (KIAA1264)      | Km app | 9  | 4   | 4   | 4  | 3  |
| PASK                 | Km app | 13 | 8   | 14  | 11 | 7  |
| PDGFRA (PDGFR alpha) | Km app | 12 | 6   | 0   | -1 | 2  |
| PDGFRA D842V         | Km app | 9  | 15  | 8   | -2 | 2  |
| PDGFRA T674I         | Km app | 7  | 8   | -6  | -4 | -9 |
| PDGFRA V561D         | Km app | 35 | 37  | 22  | 7  | 7  |
| PDGFRB (PDGFR beta)  | Km app | 6  | 10  | -3  | -6 | -4 |
| PDK1 Direct          | Km app | 16 | -3  | 7   | 4  | 7  |
| PDK1                 | 100    | 7  | -8  | 16  | 12 | 13 |
| PEAK1                | Km app | 30 | 50  | 32  | 1  | 4  |
| PHKG1                | Km app | 4  | 4   | 3   | 6  | 3  |
| PHKG2                | Km app | 6  | 4   | 5   | 5  | 3  |
| PIM1                 | Km app | 6  | 5   | 7   | 6  | 7  |
| PIM2                 | Km app | 3  | 2   | 4   | 3  | 3  |
| PIM3                 | Km app | 17 | 14  | 6   | 7  | 3  |
| PKN1 (PRK1)          | Km app | 7  | 5   | 12  | 11 | 6  |
| PLK1                 | Km app | 7  | 5   | 4   | 6  | 6  |
| PLK2                 | Km app | 5  | 5   | 1   | 2  | 1  |
| PLK3                 | Km app | 4  | 0   | 4   | 1  | -4 |
| PRKACA (PKA)         | Km app | 54 | 51  | 23  | 3  | 7  |
| PRKCA (PKC alpha)    | Km app | 1  | 7   | 5   | 2  | 8  |
| PRKCB1 (PKC beta I)  | Km app | 13 | 13  | 9   | 11 | 13 |
| PRKCB2 (PKC beta II) | Km app | 8  | 9   | 6   | 13 | 16 |
| PRKCD (PKC delta)    | Km app | 8  | 9   | 4   | 5  | 2  |
| PRKCE (PKC epsilon)  | Km app | 18 | 14  | 11  | 10 | 9  |
| PRKCG (PKC gamma)    | Km app | 8  | 10  | 3   | 11 | 11 |
| PRKCH (PKC eta)      | Km app | 7  | 17  | 15  | 15 | 15 |
| PRKCI (PKC iota)     | Km app | 9  | 13  | 6   | 8  | 7  |
| PRKCN (PKD3)         | Km app | 39 | 33  | 11  | 19 | 8  |
| PRKCQ (PKC theta)    | Km app | 9  | 10  | 14  | 6  | 11 |
| PRKCZ (PKC zeta)     | Km app | 7  | 13  | 1   | 2  | 6  |
| PRKD1 (PKC mu)       | Km app | 80 | 54  | 10  | 36 | 13 |
| PRKD2 (PKD2)         | Km app | 75 | 63  | 12  | 35 | 16 |
| PRKG1                | Km app | 2  | 3   | -1  | 0  | 2  |
| PRKG2 (PKG2)         | Km app | 7  | 10  | 3   | 3  | 1  |
| PRKX                 | Km app | 9  | 8   | 2   | 5  | 4  |
| PTK2 (FAK)           | Km app | 10 | 3   | 4   | 5  | 8  |

|                         |        |    |    |    |    |     |
|-------------------------|--------|----|----|----|----|-----|
| PTK2B (FAK2)            | Km app | 9  | 4  | 4  | -1 | -1  |
| PTK6 (Brk)              | Km app | 88 | 75 | 46 | 1  | 7   |
| RAF1 (cRAF) Y340D Y341D | 100    | 18 | 19 | 6  | 0  | 5   |
| RET A883F               | Km app | 63 | 59 | 35 | -1 | 0   |
| RET S891A               | Km app | 65 | 59 | 57 | -2 | 6   |
| RET V804E               | Km app | 16 | 22 | 0  | -3 | -3  |
| RET V804L               | Km app | 8  | 11 | 14 | 2  | 3   |
| RET Y791F               | Km app | 79 | 69 | 60 | 5  | 12  |
| RET                     | Km app | 76 | 62 | 52 | 5  | 13  |
| ROCK1                   | Km app | 3  | 4  | 4  | 6  | 4   |
| ROCK2                   | Km app | -8 | 15 | 16 | 16 | -10 |
| ROS1                    | Km app | 9  | 2  | 28 | 4  | 13  |
| RPS6KA1 (RSK1)          | Km app | 9  | 3  | 9  | 8  | 12  |
| RPS6KA2 (RSK3)          | Km app | 9  | 6  | 10 | 13 | 7   |
| RPS6KA3 (RSK2)          | Km app | 6  | 1  | 2  | 1  | 3   |
| RPS6KA4 (MSK2)          | Km app | 5  | 8  | 7  | 2  | 1   |
| RPS6KA5 (MSK1)          | Km app | 10 | 1  | 5  | 6  | 7   |
| RPS6KA6 (RSK4)          | Km app | 17 | 17 | 18 | 14 | 9   |
| RPS6KB1 (p70S6K)        | Km app | 6  | 2  | 3  | 9  | 6   |
| RPS6KB2 (p70S6Kb)       | Km app | 4  | 16 | 5  | 26 | 12  |
| SBK1                    | Km app | 3  | 5  | -2 | -1 | -4  |
| SGK (SGK1)              | Km app | 13 | 3  | 2  | 6  | 5   |
| SGK2                    | Km app | 6  | 8  | 2  | 1  | 1   |
| SGKL (SGK3)             | Km app | 5  | 6  | 3  | 0  | 3   |
| SNF1LK2                 | Km app | 14 | 20 | 17 | 43 | 42  |
| SRC N1                  | Km app | 46 | 56 | 38 | 8  | 12  |
| SRC                     | Km app | 35 | 33 | 21 | 3  | 8   |
| SRMS (Srm)              | Km app | 18 | 13 | 11 | 3  | 2   |
| SRPK1                   | Km app | 8  | 6  | 6  | 5  | 6   |
| SRPK2                   | Km app | 1  | 3  | 2  | 0  | 1   |
| STK22B (TSSK2)          | Km app | 6  | 1  | 2  | 4  | 5   |
| STK22D (TSSK1)          | Km app | 3  | 7  | 7  | 9  | 9   |
| STK23 (MSSK1)           | Km app | 6  | 2  | 3  | 2  | 3   |
| STK24 (MST3)            | Km app | 10 | 13 | 8  | 4  | 7   |
| STK25 (YSK1)            | Km app | 10 | 15 | 9  | 10 | 10  |
| STK3 (MST2)             | Km app | 9  | 11 | 9  | 3  | 8   |
| STK4 (MST1)             | Km app | 4  | 9  | 4  | 5  | 2   |
| SYK                     | Km app | 7  | 11 | 4  | 3  | 1   |
| TAOK2 (TAO1)            | Km app | 3  | 3  | 6  | 1  | 2   |
| TBK1                    | Km app | 4  | 7  | 0  | -1 | -1  |
| TEK (TIE2) Y897S        | Km app | 2  | 5  | 5  | 3  | -2  |
| TEK (Tie2)              | Km app | 12 | -1 | 16 | 1  | 6   |
| TNK1                    | Km app | 8  | 10 | 10 | 5  | 5   |
| TXK                     | Km app | 36 | 68 | 43 | 7  | 24  |
| TYK2                    | Km app | 7  | 9  | 2  | 3  | -2  |
| TYRO3 (RSE)             | Km app | 7  | 4  | 5  | 3  | 1   |
| YES1                    | Km app | 63 | 70 | 56 | 9  | 14  |
| ZAP70                   | Km app | 6  | 8  | 2  | 4  | -1  |

### Legend

|                      |
|----------------------|
| < 40% Inhibition     |
| 40% - 80% Inhibition |
| ≥ 80% Inhibition     |

**Table S4. ThermoFisher Scientific Adapta Kinase Profiling**

| Kinase Tested                                       | [ATP]<br>Tested<br>( $\mu$ M) | 3MBPP1<br>(1 $\mu$ M)<br>% Inhibition<br>(mean of<br>2 points) | Compound 1<br>(1 $\mu$ M)<br>% Inhibition<br>(mean of<br>2 points) | Compound 2<br>(1 $\mu$ M)<br>% Inhibition<br>(mean of<br>2 points) | Compound 13<br>(1 $\mu$ M)<br>% Inhibition<br>(mean of<br>2 points) | Compound 24<br>(1 $\mu$ M)<br>% Inhibition<br>(mean of<br>2 points) |
|-----------------------------------------------------|-------------------------------|----------------------------------------------------------------|--------------------------------------------------------------------|--------------------------------------------------------------------|---------------------------------------------------------------------|---------------------------------------------------------------------|
| CAMK1 (CaMK1)                                       | 10                            | -8                                                             | -11                                                                | 9                                                                  | 0                                                                   | -8                                                                  |
| CDK4/cyclin D1                                      | 10                            | 23                                                             | 19                                                                 | 18                                                                 | 13                                                                  | 14                                                                  |
| CDK4/cyclin D3                                      | 10                            | -11                                                            | -7                                                                 | 3                                                                  | -10                                                                 | -12                                                                 |
| CDK6/cyclin D1                                      | 10                            | 10                                                             | 6                                                                  | 14                                                                 | 19                                                                  | 15                                                                  |
| CDK7/cyclin H/MNAT1                                 | Km app                        | -13                                                            | -3                                                                 | -13                                                                | -9                                                                  | -7                                                                  |
| CDK9/cyclin T1                                      | Km app                        | 21                                                             | 20                                                                 | 32                                                                 | 20                                                                  | 13                                                                  |
| CHUK (IKK alpha)                                    | Km app                        | 6                                                              | 6                                                                  | 6                                                                  | 4                                                                   | 4                                                                   |
| DAPK1                                               | Km app                        | 27                                                             | 15                                                                 | 31                                                                 | 25                                                                  | 26                                                                  |
| GSG2 (Haspin)                                       | Km app                        | 25                                                             | 30                                                                 | 87                                                                 | 41                                                                  | 32                                                                  |
| IRAK1                                               | Km app                        | -19                                                            | -10                                                                | -6                                                                 | 2                                                                   | 16                                                                  |
| LRRK2 FL                                            | Km app                        | 1                                                              | -6                                                                 | 1                                                                  | -6                                                                  | -3                                                                  |
| LRRK2 G2019S FL                                     | Km app                        | 3                                                              | 4                                                                  | 6                                                                  | 1                                                                   | 0                                                                   |
| LRRK2 G2019S                                        | Km app                        | -7                                                             | -10                                                                | 5                                                                  | -3                                                                  | -4                                                                  |
| LRRK2 I2020T                                        | Km app                        | -3                                                             | 0                                                                  | -1                                                                 | -2                                                                  | -5                                                                  |
| LRRK2 R1441C                                        | Km app                        | 21                                                             | 1                                                                  | 11                                                                 | 3                                                                   | 6                                                                   |
| LRRK2                                               | Km app                        | -1                                                             | 3                                                                  | 9                                                                  | 0                                                                   | -2                                                                  |
| NUAK1 (ARK5)                                        | Km app                        | 10                                                             | -8                                                                 | 16                                                                 | 16                                                                  | 11                                                                  |
| PI4K2A (PI4K2 alpha)                                | Km app                        | 0                                                              | 10                                                                 | 5                                                                  | 0                                                                   | -5                                                                  |
| PI4K2B (PI4K2 beta)                                 | Km app                        | -7                                                             | -7                                                                 | -12                                                                | -9                                                                  | -9                                                                  |
| PI4KA (PI4K alpha)                                  | 10                            | -11                                                            | -13                                                                | -8                                                                 | -5                                                                  | -15                                                                 |
| PI4KB (PI4K beta)                                   | Km app                        | 18                                                             | 18                                                                 | 15                                                                 | 12                                                                  | 17                                                                  |
| PIK3C2A (PI3K-C2 alpha)                             | Km app                        | -2                                                             | -3                                                                 | 3                                                                  | 0                                                                   | 9                                                                   |
| PIK3C2B (PI3K-C2 beta)                              | 10                            | -1                                                             | -7                                                                 | 3                                                                  | 1                                                                   | 14                                                                  |
| PIK3C2G (PI3K-C2 gamma)                             | Km app                        | 0                                                              | 3                                                                  | 16                                                                 | 11                                                                  | 9                                                                   |
| PIK3C3 (hVPS34)                                     | Km app                        | -2                                                             | -5                                                                 | -2                                                                 | -6                                                                  | -2                                                                  |
| PIK3CA E542K/PIK3R1 (p110<br>alpha E542K/p85 alpha) | 10                            | 7                                                              | 0                                                                  | 7                                                                  | 8                                                                   | 8                                                                   |
| PIK3CA E545K/PIK3R1 (p110<br>alpha E545K/p85 alpha) | Km app                        | -15                                                            | -5                                                                 | 2                                                                  | -3                                                                  | 0                                                                   |
| PIK3CA/PIK3R1 (p110<br>alpha/p85 alpha)             | Km app                        | -4                                                             | -3                                                                 | 3                                                                  | -10                                                                 | 2                                                                   |
| PIK3CA/PIK3R3 (p110<br>alpha/p55 gamma)             | Km app                        | -8                                                             | 3                                                                  | 3                                                                  | 2                                                                   | 5                                                                   |
| PIK3CB/PIK3R1 (p110<br>beta/p85 alpha)              | Km app                        | -1                                                             | -6                                                                 | -13                                                                | -8                                                                  | 6                                                                   |
| PIK3CB/PIK3R2 (p110<br>beta/p85 beta)               | Km app                        | 5                                                              | 4                                                                  | 0                                                                  | 4                                                                   | -1                                                                  |
| PIK3CD/PIK3R1 (p110<br>delta/p85 alpha)             | Km app                        | 2                                                              | -2                                                                 | 15                                                                 | 9                                                                   | 8                                                                   |
| PIK3CG (p110 gamma)                                 | Km app                        | -4                                                             | 7                                                                  | 5                                                                  | 10                                                                  | 7                                                                   |
| PIP4K2A                                             | 10                            | -36                                                            | -7                                                                 | -7                                                                 | -22                                                                 | -7                                                                  |
| PIP5K1A                                             | 10                            | -6                                                             | 8                                                                  | 18                                                                 | 20                                                                  | 23                                                                  |
| PIP5K1B                                             | 10                            | -17                                                            | -8                                                                 | 3                                                                  | -4                                                                  | -4                                                                  |
| PIP5K1C                                             | 10                            | 0                                                              | 18                                                                 | 37                                                                 | 10                                                                  | 21                                                                  |
| SPHK1                                               | Km app                        | -12                                                            | 7                                                                  | 14                                                                 | 10                                                                  | 3                                                                   |
| SPHK2                                               | 10                            | -8                                                             | 0                                                                  | -6                                                                 | -1                                                                  | 6                                                                   |

Legend: same as Table S3.

**Table S5. ThermoFisher Scientific LanthaScreen Kinase Profiling**

| Kinase Tested             | 3MBPP1<br>(1µM)<br>% Displacement<br>(mean of 2 points) | Compound 1<br>(1µM)<br>% Displacement<br>(mean of 2 points) | Compound 2<br>(1µM)<br>% Displacement<br>(mean of 2 points) | Compound 13<br>(1µM)<br>% Displacement<br>(mean of 2 points) | Compound 24<br>(1µM)<br>% Displacement<br>(mean of 2 points) |
|---------------------------|---------------------------------------------------------|-------------------------------------------------------------|-------------------------------------------------------------|--------------------------------------------------------------|--------------------------------------------------------------|
| AAK1                      | 1                                                       | 0                                                           | 8                                                           | 3                                                            | 4                                                            |
| ABL1 H396P                | 35                                                      | 52                                                          | 55                                                          | 5                                                            | 7                                                            |
| ABL1 M351T                | 35                                                      | 52                                                          | 56                                                          | 3                                                            | 2                                                            |
| ABL1 Q252H                | 33                                                      | 55                                                          | 49                                                          | -3                                                           | 0                                                            |
| ACVR1 (ALK2)<br>R206H     | 31                                                      | 29                                                          | 44                                                          | 2                                                            | 1                                                            |
| ACVR1 (ALK2)              | 20                                                      | 20                                                          | 36                                                          | 0                                                            | 2                                                            |
| ACVR2A                    | 13                                                      | 12                                                          | 15                                                          | -4                                                           | -5                                                           |
| ACVR2B                    | 34                                                      | 45                                                          | 42                                                          | -1                                                           | -2                                                           |
| ACVRL1 (ALK1)             | 32                                                      | 26                                                          | 41                                                          | 6                                                            | -4                                                           |
| ADCK3                     | 3                                                       | 5                                                           | 13                                                          | 10                                                           | 19                                                           |
| ALK C1156Y                | 8                                                       | -1                                                          | 6                                                           | 3                                                            | 5                                                            |
| ALK F1174L                | 3                                                       | 1                                                           | 10                                                          | -3                                                           | 1                                                            |
| ALK L1196M                | 2                                                       | 4                                                           | 8                                                           | 1                                                            | 1                                                            |
| ALK R1275Q                | 8                                                       | 4                                                           | 12                                                          | 1                                                            | 4                                                            |
| ALK<br>T1151_L1152insT    | 2                                                       | 3                                                           | 3                                                           | 1                                                            | 1                                                            |
| AMPK (A1/B1/G2)           | 4                                                       | 3                                                           | 8                                                           | 5                                                            | 6                                                            |
| AMPK (A1/B1/G3)           | -2                                                      | 2                                                           | 9                                                           | 5                                                            | 4                                                            |
| AMPK (A1/B2/G1)           | -3                                                      | 2                                                           | 3                                                           | 0                                                            | 2                                                            |
| AMPK (A2/B2/G1)           | -2                                                      | 9                                                           | 11                                                          | 3                                                            | 7                                                            |
| AMPK (A2/B2/G2)           | 0                                                       | -1                                                          | 8                                                           | -8                                                           | 8                                                            |
| ANKK1                     | 0                                                       | 3                                                           | 8                                                           | 13                                                           | 4                                                            |
| AXL R499C                 | 2                                                       | 5                                                           | 10                                                          | -3                                                           | 1                                                            |
| BMPR1A (ALK3)             | 11                                                      | 7                                                           | 18                                                          | 7                                                            | 9                                                            |
| BMPR2                     | 13                                                      | 20                                                          | 16                                                          | 3                                                            | 6                                                            |
| BRAF V599E                | 12                                                      | 24                                                          | 16                                                          | 3                                                            | 8                                                            |
| BRAF                      | 12                                                      | 26                                                          | 14                                                          | -1                                                           | 6                                                            |
| BRSK2                     | 0                                                       | 1                                                           | 3                                                           | 7                                                            | 18                                                           |
| CAMK2G (CaMKII<br>gamma)  | -3                                                      | 0                                                           | 11                                                          | -4                                                           | 7                                                            |
| CAMKK1 (CAMKKA)           | -6                                                      | -6                                                          | -4                                                          | -7                                                           | 0                                                            |
| CAMKK2 (CaMKK<br>beta)    | 5                                                       | 3                                                           | -1                                                          | -1                                                           | -6                                                           |
| CASK                      | 5                                                       | 10                                                          | 15                                                          | 14                                                           | 3                                                            |
| CDC7/DBF4                 | 13                                                      | 10                                                          | 23                                                          | 11                                                           | 32                                                           |
| CDK1/cyclin A2            | 11                                                      | -3                                                          | 17                                                          | 19                                                           | -3                                                           |
| CDK11 (Inactive)          | 7                                                       | 19                                                          | 42                                                          | 1                                                            | 19                                                           |
| CDK11/cyclin C            | 28                                                      | 40                                                          | 62                                                          | 5                                                            | 15                                                           |
| CDK13/cyclin K            | 7                                                       | 8                                                           | 15                                                          | 14                                                           | 6                                                            |
| CDK14<br>(PFTK1)/cyclin Y | -9                                                      | 7                                                           | 18                                                          | 12                                                           | 1                                                            |
| CDK16<br>(PCTK1)/cyclin Y | 5                                                       | 8                                                           | 15                                                          | 7                                                            | 5                                                            |
| CDK2/cyclin A1            | 16                                                      | 20                                                          | 14                                                          | 7                                                            | 8                                                            |
| CDK2/cyclin E1            | 12                                                      | 20                                                          | 12                                                          | 8                                                            | 7                                                            |
| CDK2/cyclin O             | 19                                                      | 43                                                          | 20                                                          | 13                                                           | 12                                                           |
| CDK3/cyclin E1            | 2                                                       | 7                                                           | 8                                                           | 6                                                            | 2                                                            |
| CDK5 (Inactive)           | -6                                                      | -1                                                          | 0                                                           | -5                                                           | 3                                                            |
| CDK8/cyclin C             | 9                                                       | 13                                                          | 54                                                          | 3                                                            | 7                                                            |
| CDK9 (Inactive)           | 19                                                      | 16                                                          | 28                                                          | 15                                                           | 19                                                           |
| CDK9/cyclin K             | 3                                                       | 9                                                           | 9                                                           | 4                                                            | 3                                                            |
| CLK4                      | 19                                                      | 40                                                          | 49                                                          | 8                                                            | 14                                                           |
| DAPK2                     | 7                                                       | 11                                                          | 3                                                           | 1                                                            | 4                                                            |
| DDR1                      | 6                                                       | 7                                                           | 9                                                           | 2                                                            | 1                                                            |

|                               |    |    |    |    |    |
|-------------------------------|----|----|----|----|----|
| DDR2 N456S                    | 80 | 61 | 73 | 34 | 26 |
| DDR2 T654M                    | 18 | 22 | 45 | 0  | 11 |
| DDR2                          | 4  | 7  | 9  | 2  | 2  |
| DMPK                          | 2  | 3  | 1  | 2  | 1  |
| DYRK2                         | 6  | 4  | 15 | -7 | 14 |
| EGFR (ErbB1) d746-750         | 83 | 96 | 92 | 12 | 34 |
| EGFR (ErbB1) d747-749 A750P   | 68 | 97 | 78 | 20 | 15 |
| EIF2AK2 (PKR)                 | -1 | -8 | 9  | 5  | 18 |
| EPHA3                         | 51 | 61 | 32 | -1 | 1  |
| EPHA6                         | 84 | 90 | 81 | 10 | 27 |
| EPHA7                         | 10 | 17 | 17 | 1  | 4  |
| ERN1                          | 3  | -2 | 15 | 10 | 5  |
| ERN2                          | -1 | 2  | 6  | 3  | 4  |
| FGFR1 V561M                   | 11 | 7  | 13 | 12 | 12 |
| FGFR3 G697C                   | 19 | 15 | 3  | 16 | 9  |
| FGFR3 K650M                   | 38 | 32 | 20 | 3  | 7  |
| FLT3 ITD                      | 6  | 0  | 31 | -2 | 4  |
| FYN A                         | 26 | 41 | 26 | -1 | -7 |
| GAK                           | 70 | 84 | 80 | 16 | 3  |
| GRK1                          | 3  | 3  | 2  | 6  | 0  |
| HUNK                          | 91 | 92 | 89 | 12 | 10 |
| ICK                           | 3  | 4  | 7  | 4  | 8  |
| IRAK3                         | 69 | 79 | 92 | 18 | 42 |
| KIT A829P                     | 78 | 74 | 75 | 2  | 8  |
| KIT D816H                     | 71 | 69 | 58 | 9  | 2  |
| KIT D816V                     | 68 | 67 | 59 | 6  | 6  |
| KIT D820E                     | 8  | 6  | 5  | 1  | 2  |
| KIT N822K                     | 45 | 37 | 31 | 5  | 2  |
| KIT T670E                     | 3  | 0  | 3  | 7  | 2  |
| KIT V559D T670I               | 5  | 6  | 5  | 4  | 3  |
| KIT V654A                     | 2  | 8  | 6  | 3  | 10 |
| KIT Y823D                     | 26 | 15 | 11 | 5  | -9 |
| LATS1                         | 12 | 8  | 5  | 8  | 26 |
| LATS2                         | -1 | 4  | 13 | 2  | 7  |
| LIMK1                         | 15 | 3  | 6  | 0  | -1 |
| LIMK2                         | 1  | 3  | 3  | 3  | 4  |
| MAP2K1 (MEK1) S218D S222D     | 15 | 32 | 17 | 4  | 2  |
| MAP2K1 (MEK1)                 | 19 | 26 | 17 | -1 | 0  |
| MAP2K2 (MEK2)                 | 10 | 23 | 10 | 3  | 0  |
| MAP2K3 (MEK3)                 | 0  | 6  | -1 | -5 | 1  |
| MAP2K4 (MEK4)                 | 29 | 53 | 30 | -3 | 4  |
| MAP2K5 (MEK5)                 | 27 | 43 | 32 | 5  | 8  |
| MAP2K6 (MKK6) S207E T211E     | 20 | 36 | 23 | 17 | 15 |
| MAP2K6 (MKK6)                 | 5  | 15 | 5  | 10 | 4  |
| MAP3K10 (MLK2)                | 5  | 4  | 8  | 2  | 0  |
| MAP3K11 (MLK3)                | 2  | -1 | 5  | 1  | 2  |
| MAP3K14 (NIK)                 | -1 | 0  | 5  | 0  | 1  |
| MAP3K2 (MEKK2)                | 14 | 42 | 16 | 1  | -4 |
| MAP3K3 (MEKK3)                | 49 | 63 | 22 | 0  | 1  |
| MAP3K5 (ASK1)                 | 1  | -1 | -4 | 2  | 0  |
| MAP3K7/MAP3K7IP 1 (TAK1-TAB1) | 16 | 17 | 21 | 10 | 6  |
| MAP4K1 (HPK1)                 | 6  | 13 | 5  | 0  | 2  |
| MAP4K3 (GLK)                  | 10 | 14 | 8  | 3  | 5  |
| MAPK10 (JNK3)                 | 33 | 43 | 39 | 0  | 0  |
| MAPK15 (ERK7)                 | 11 | 13 | 28 | 6  | 7  |
| MAPK8 (JNK1)                  | 4  | 20 | 19 | 6  | 4  |
| MAPK9 (JNK2)                  | 31 | 41 | 31 | 2  | 4  |

|                            |     |     |    |     |    |
|----------------------------|-----|-----|----|-----|----|
| MASTL                      | 2   | -2  | 3  | 1   | 2  |
| MERTK (cMER)<br>A708S      | 10  | 1   | 13 | 5   | 1  |
| MET D1228H                 | -4  | -2  | 9  | 4   | 1  |
| MKNK2 (MNK2)               | -2  | -1  | 8  | -2  | 7  |
| MLCK (MLCK2)               | 9   | 10  | 10 | 2   | -2 |
| MLK4                       | -3  | 2   | 6  | 7   | 5  |
| MYLK (MLCK)                | 1   | 7   | 8  | 1   | 4  |
| MYLK4                      | 7   | -3  | 9  | 12  | 19 |
| MYO3A (MYO3<br>alpha)      | 6   | 9   | 6  | 3   | 7  |
| MYO3B (MYO3<br>beta)       | 14  | 14  | 17 | 8   | 8  |
| NEK8                       | 0   | 3   | 4  | 3   | -3 |
| NLK                        | 32  | 49  | 60 | 45  | 27 |
| NUAK2                      | 3   | -2  | 12 | 13  | 7  |
| OXSR1                      | 5   | 2   | 16 | 4   | 7  |
| PKMYT1                     | 4   | -1  | 5  | 2   | 12 |
| PKN2 (PRK2)                | -5  | -2  | 5  | 7   | 5  |
| PLK4                       | 1   | 2   | 55 | 1   | 4  |
| PRKACB (PRKAC<br>beta)     | 86  | 85  | 71 | 9   | 11 |
| PRKACG (PRKAC<br>gamma)    | 81  | 79  | 80 | -15 | 4  |
| RAF1 (cRAF) Y340D<br>Y341D | 20  | 39  | 17 | -1  | 5  |
| RET G691S                  | 79  | 77  | 64 | 5   | 12 |
| RET M918T                  | 63  | 58  | 57 | -5  | -1 |
| RET V804M                  | 9   | 6   | 16 | 6   | 2  |
| RIPK2                      | 82  | 90  | 92 | 46  | 41 |
| RIPK3                      | 82  | 75  | 70 | -2  | 23 |
| SIK1                       | 6   | 13  | 13 | 3   | 4  |
| SIK3                       | 7   | 21  | 19 | 27  | 30 |
| SLK                        | 4   | 2   | 14 | 0   | 1  |
| STK16 (PKL12)              | 5   | 7   | -1 | 1   | 2  |
| STK17A (DRAK1)             | 3   | 8   | 22 | 1   | 3  |
| STK17B (DRAK2)             | 11  | 3   | 5  | 2   | 4  |
| STK32B (YANK2)             | 40  | 45  | 18 | 6   | 6  |
| STK32C (YANK3)             | 26  | 26  | 7  | 3   | 2  |
| STK33                      | 0   | 5   | 0  | -2  | -1 |
| STK38 (NDR)                | 0   | 4   | 9  | 5   | 6  |
| STK38L (NDR2)              | 2   | 3   | 11 | 2   | 7  |
| STK39 (STLK3)              | -3  | -4  | 14 | 6   | -2 |
| TAOK1                      | 9   | 15  | 22 | 8   | 3  |
| TAOK3 (JIK)                | 4   | 4   | 7  | -2  | 4  |
| TEC                        | 2   | 6   | 3  | 2   | 2  |
| TEK (TIE2) R849W           | -15 | -9  | 6  | -14 | -4 |
| TEK (TIE2) Y1108F          | 0   | 2   | 12 | -10 | 2  |
| TESK1                      | 12  | 31  | 67 | 10  | 22 |
| TESK2                      | 32  | 49  | 36 | -3  | -3 |
| TGFBR1 (ALK5)              | 84  | 86  | 80 | -2  | 0  |
| TGFBR2                     | 41  | 60  | 54 | 7   | 17 |
| TLK1                       | 0   | 0   | 2  | 4   | -1 |
| TLK2                       | -2  | -1  | -1 | 3   | -1 |
| TNIK                       | 51  | 72  | 43 | 34  | 30 |
| TNK2 (ACK)                 | 19  | 30  | 11 | 0   | 1  |
| TTK                        | 13  | 10  | 11 | 0   | 6  |
| ULK1                       | -1  | 4   | 0  | 1   | 4  |
| ULK2                       | 5   | 4   | 2  | 4   | 5  |
| ULK3                       | 2   | -11 | 5  | 4   | -5 |
| VRK2                       | 2   | 13  | 17 | 10  | 7  |
| WEE1                       | 5   | 7   | 4  | 4   | 5  |

|      |    |    |    |     |    |
|------|----|----|----|-----|----|
| Wnk1 | -4 | -4 | -3 | -10 | -4 |
| Wnk2 | 0  | -5 | -9 | -5  | -4 |
| Wnk3 | 1  | -2 | 3  | 1   | -2 |
| Zak  | 1  | 2  | 5  | -2  | 1  |

#### Legend

|                        |
|------------------------|
| < 40% Displacement     |
| 40% - 80% Displacement |
| ≥ 80% Displacement     |

## References

- (1) Bulawa, C. E.; Devit, M.; Elbaum, D. Modulation of Protein Trafficking. EP20080848219, 2010.
- (2) Hanefeld, U.; Rees, C. W.; White, A. J. P.; Williams, D. J. One-Pot Synthesis of Tetrasubstituted Pyrazoles - Proof of Regiochemistry. *J. Am. Chem. Soc. Perkin Trans. 1* **1996**, 0 (13), 1545–1552.
- (3) Schenone, S.; Radi, M.; Musumeci, F.; Brullo, C.; Botta, M. Biologically Driven Synthesis of Pyrazolo[3,4-D]pyrimidines As Protein Kinase Inhibitors: An Old Scaffold As a New Tool for Medicinal Chemistry and Chemical Biology Studies. *Chem. Rev.* **2014**, 114 (14), 7189–7238.
- (4) Angiolini, M.; Buffa, L.; Menichincheri, M.; Motto, I.; Polucci, P.; Traquandi, G.; Zuccotto, F. Pyrrolo[2,3-D] Pyrimidine Derivatives, Process for Their Preparation and Their Use as Kinase Inhibitors. WO2014184069A1, 2014.
- (5) Ley, S. V; Thomas, A. W. Modern Synthetic Methods for Copper-Mediated C(aryl)-O, C(aryl)-N, and C(aryl)-S Bond Formation. *Angew. Chemie Int. Ed.* **2003**, 42, 5400–5449.
- (6) Prim, D.; Campagne, J.; Andrioletti, B. Palladium-Catalysed Reactions of Aryl Halides with Soft, Non-Organometallic Nucleophiles. *Tetrahedron* **2002**, 58, 2041–2075.
- (7) Ma, D.; Cai, Q. N,N-Dimethyl Glycine-Promoted Ullmann Coupling Reaction of Phenols and Aryl Halides. *Org. Lett.* **2003**, 5 (21), 3799–3802.
- (8) Fors, B. P.; Davis, N. R.; Buchwald, S. L. An Efficient Process for Pd-Catalyzed C-N Cross-Coupling Reactions of Aryl Iodides: Insight Into Controlling Factors. *J. Am. Chem. Soc.* **2009**, 131 (16), 5766–5768.
- (9) Fors, B. P.; Watson, D. A.; Biscoe, M. R.; Buchwald, S. L. A Highly Active Catalyst for Pd-Catalyzed Amination Reactions: Cross-Coupling Reactions Using Aryl Mesylates and the Highly Selective Monoarylation of Primary Amines Using Aryl Chlorides. *J. Am. Chem. Soc.* **2008**, 130 (41), 13552–13554.
- (10) Maiti, D.; Buchwald, S. L. Orthogonal Cu- and Pd-Based Catalyst Systems for the O- and N-Arylation of Aminophenols. *J. Am. Chem. Soc.* **2009**, 131 (47), 17423–17429.
- (11) Itoh, T.; Mase, T. A General Palladium-Catalyzed Coupling of Aryl Bromides/Triflates and Thiols. *Org. Lett.* **2004**, 6 (24), 4587–4590.
- (12) Kwong, F. Y.; Buchwald, S. L. A General, Efficient, and Inexpensive Catalyst System for the Coupling of Aryl Iodides and Thiols. *Org. Lett.* **2002**, 4 (20), 3517–3520.
- (13) Apsel, B.; Blair, J. A.; Gonzalez, B.; Nazif, T. M.; Feldman, M. E.; Aizenstein, B.; Hoffman, R.; Williams, R. L.; Shokat, K. M.; Knight, Z. A. Targeted Polypharmacology: Discovery of Dual Inhibitors of Tyrosine and Phosphoinositide Kinases. *Nat. Chem. Biol.* **2008**, 4 (11), 691–699.
- (14) Johnson, S. M.; Murphy, R. C.; Geiger, J. a; Derocher, A.; Zhang, Z.; Ojo, K.; Larson, E.; Perera, B. G. K.; Dale, E.; He, P.; Fox, A.; Mueller, N.; Merritt, E. a; Fan, E.; Reid, M.; Parsons, M.; Van Voorhis, W. C.; Maly, D. J. Development of Toxoplasma Gondii Calcium-Dependent Protein Kinase 1 (TgCDPK1) Inhibitors with Potent Anti-Toxoplasma Activity. *J. Med. Chem.* **2012**, 55 (5), 2416–2426.

- (15) Lourido, S.; Zhang, C.; Lopez, M. S.; Tang, K.; Barks, J.; Wang, Q.; Wildman, S. A.; Shokat, K. M.; Sibley, L. D. Optimizing Small Molecule Inhibitors of Calcium-Dependent Protein Kinase 1 to Prevent Infection by *Toxoplasma Gondii*. *J. Med. Chem.* **2013**, *56* (7), 3068–3077.
- (16) Zaretski, J.; Matlock, M.; Swamidass, S. J. XenoSite: Accurately Predicting CYP-Mediated Sites of Metabolism with Neural Networks. *J. Chem. Inf. Model.* **2013**, *53*, 3373–3383.
- (17) Boyle, N. M. O.; Banck, M.; James, C. A.; Morley, C.; Vandermeersch, T.; Hutchison, G. R. Open Babel : An Open Chemical Toolbox. *J. Cheminform.* **2011**, *3*, 1–14.
- (18) Eid, S.; Turk, S.; Volkamer, A.; Rippmann, F.; Fulle, S. KinMap : A Web-Based Tool for Interactive Navigation through Human Kinome Data. *BMC Bioinformatics* **2017**, 1–6.
